# Supplementary material
Source: Elsevier journal article supplement (https://univ-rennes.hal.science/hal-01438101v1/file/mmc1.doc)
Supplement: mmc1 [file mmc1.doc]

*ESI*

**Synthesis, structure and photophysical properties of NIR aza-BODIPYs with** [**–F/-N3/-NH2**](http://dict.cn/fluorine atom) **groups at 1,7-positions**

**Xin-Dong Jiang, a,b* Jian Guan,a Jiuli zhao,a Boris Le Guennic,c,* Denis Jacquemin,d Zhigang Zhanga Shangdong Chena and Linjiu Xiaoa**

1 NMR

2 HRMS

3 X-ray single crystal diffraction data of **4**

4 Ground state geometries in gas phase

**1. NMR**


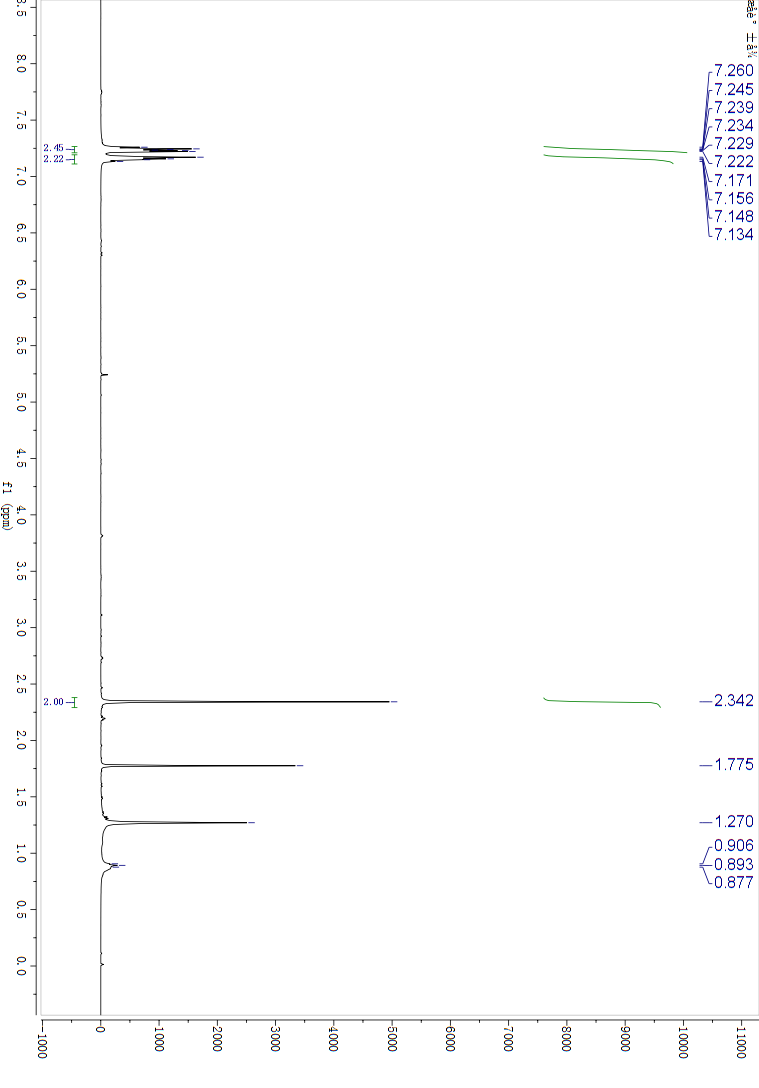


**1H NMR of 3-(4-fluorophenyl)-2*H*-azirine**


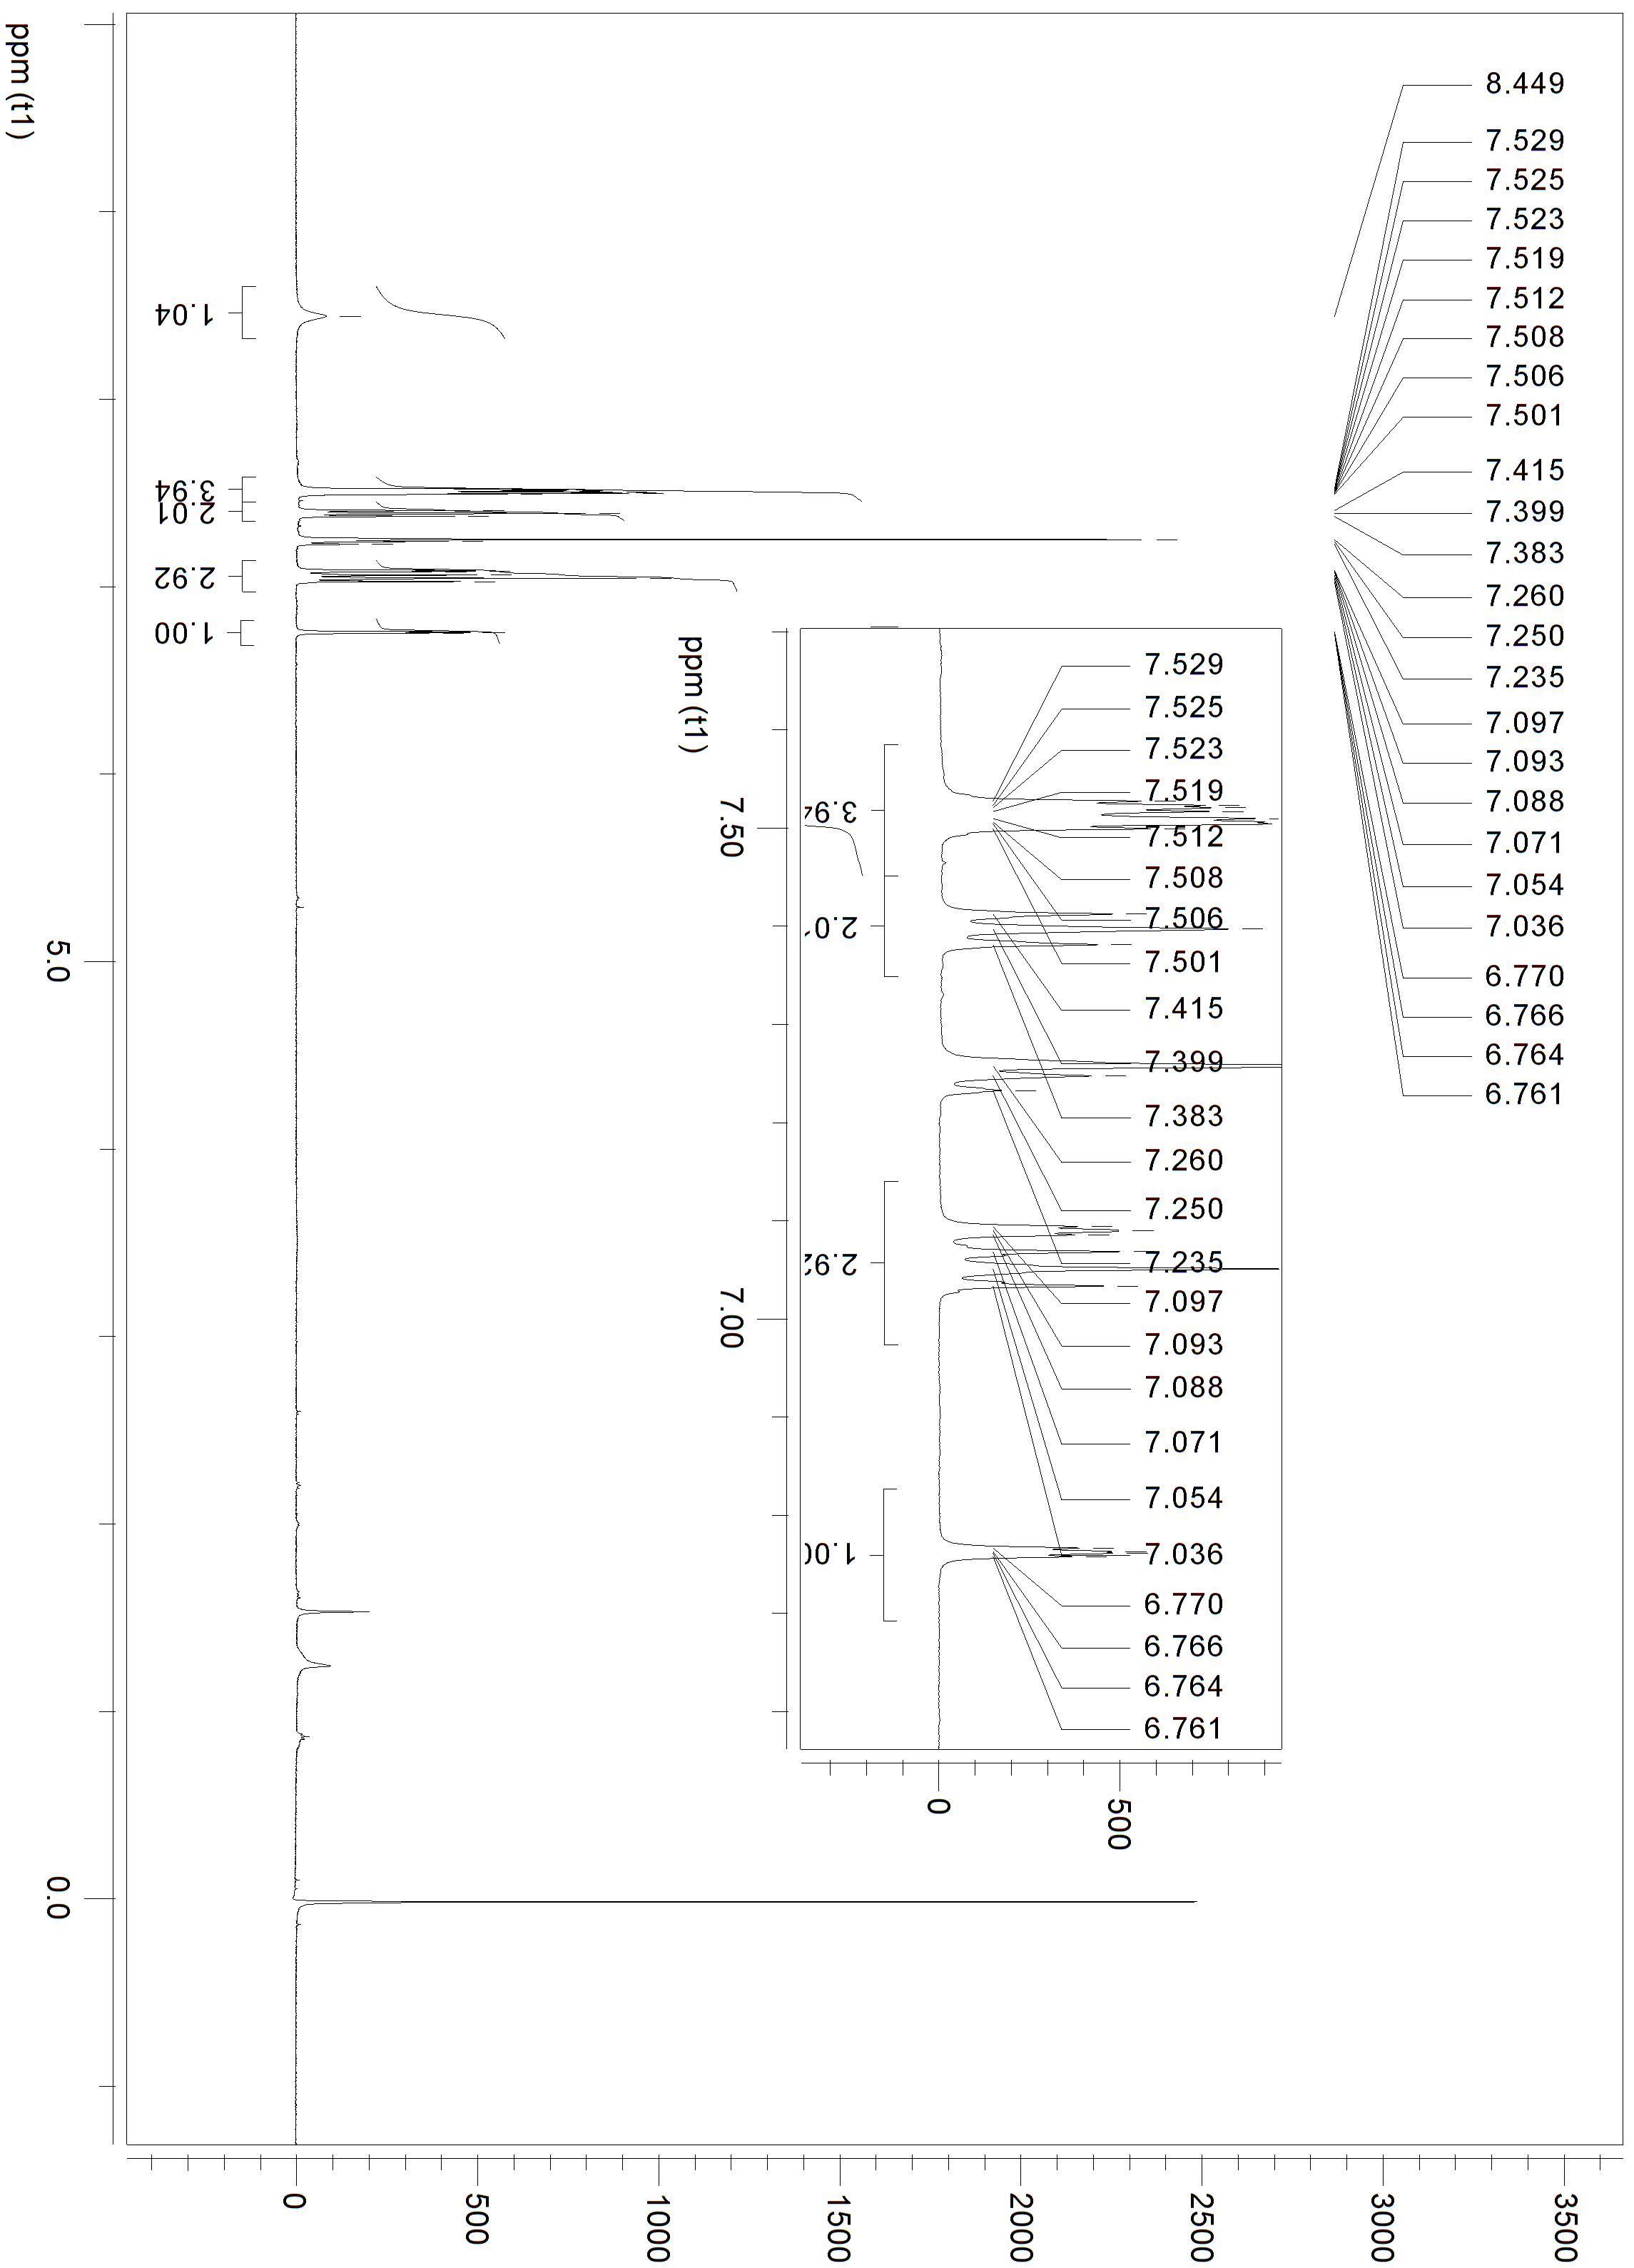


**1H NMR of pyrrole 1**


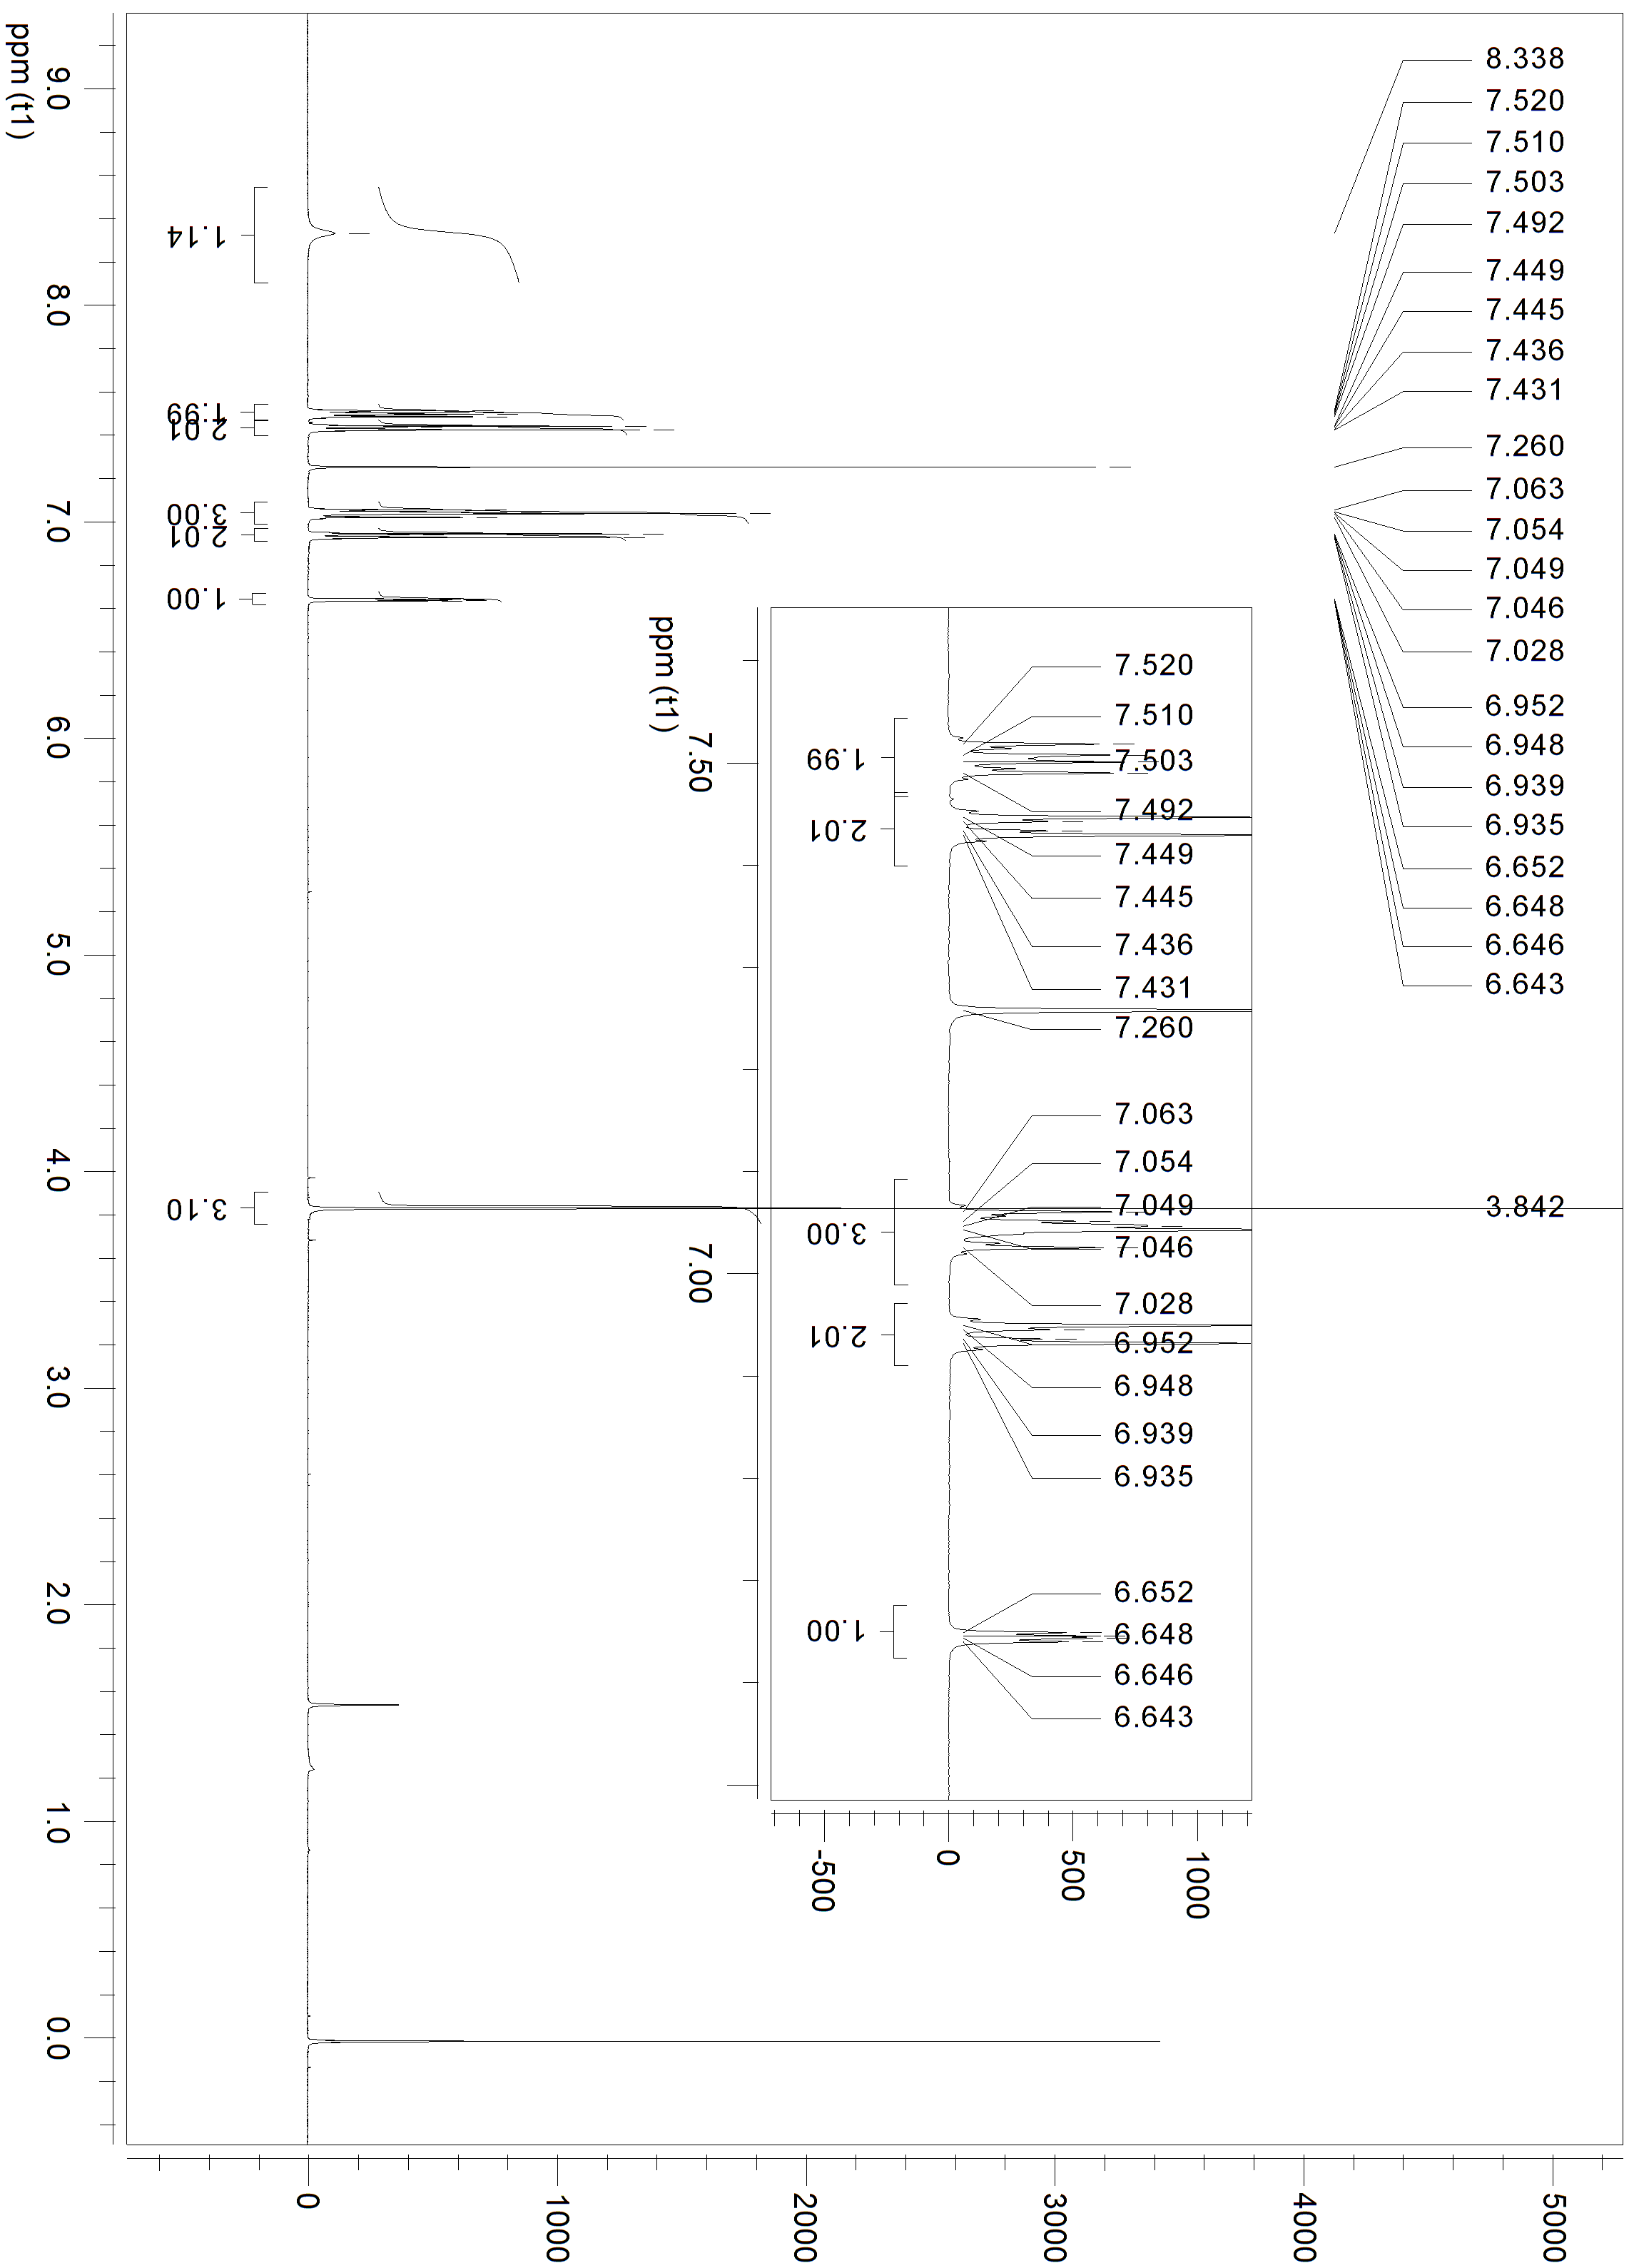


**1H NMR of pyrrole 2**

**
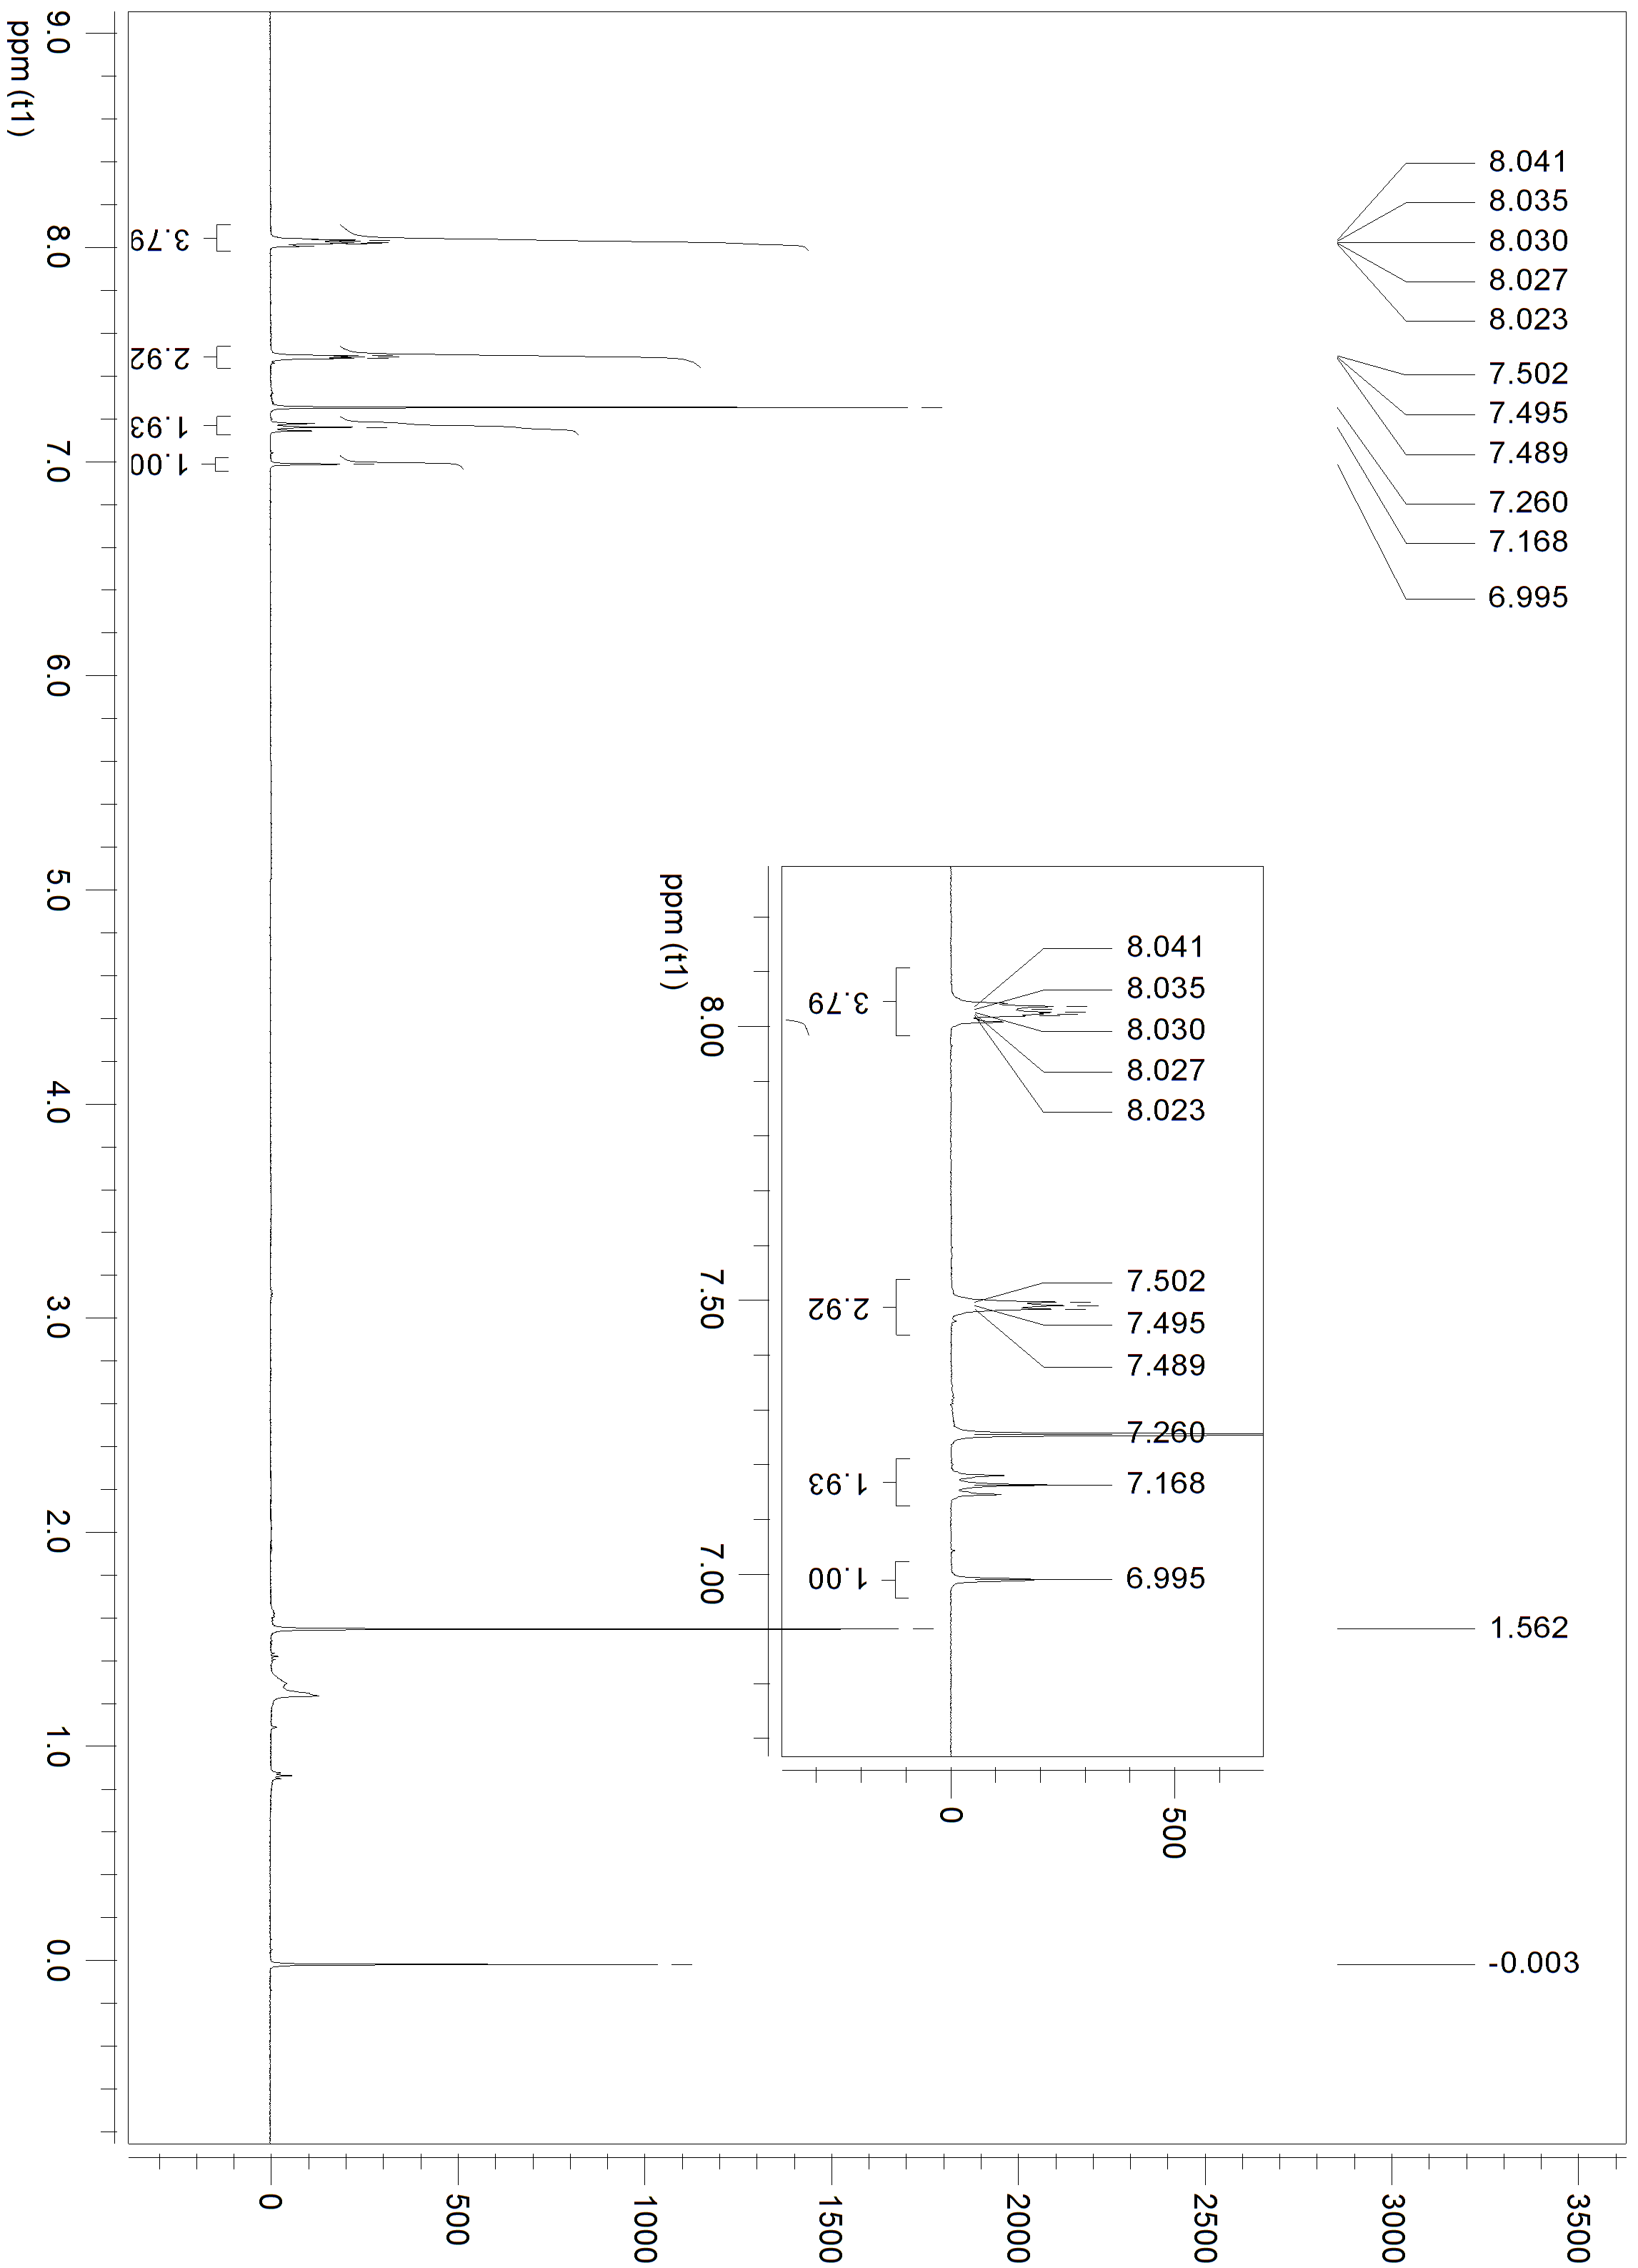
**

**1H NMR of aza-BODIPY 3**


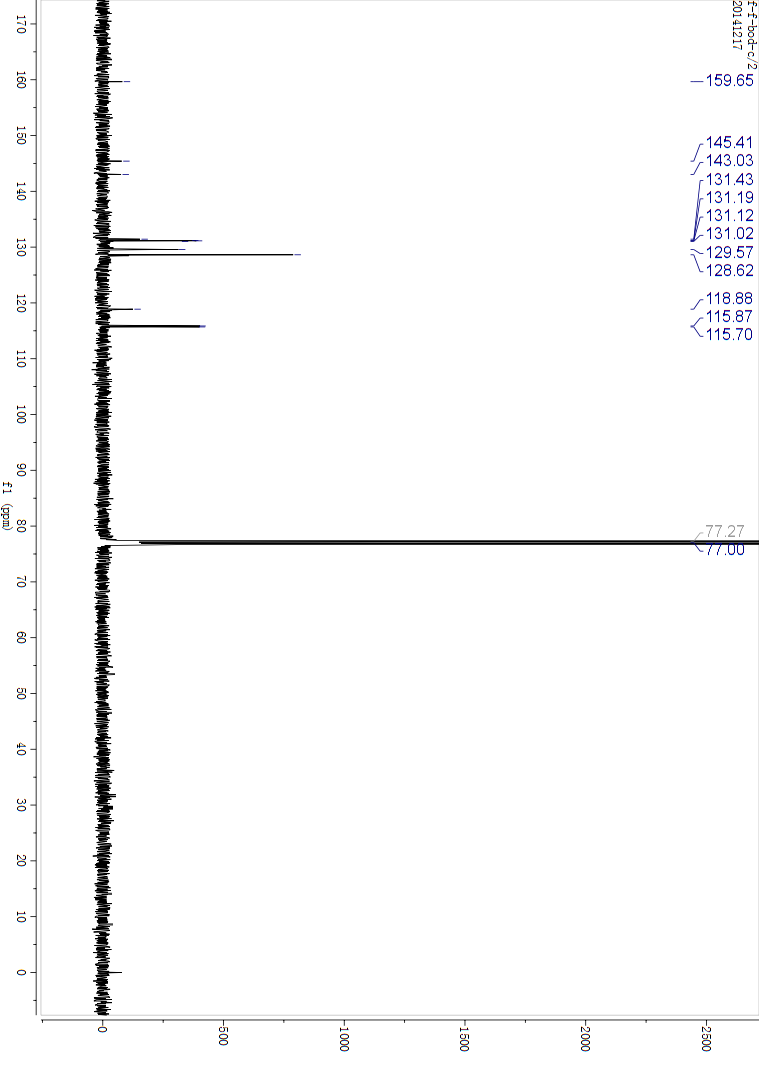


**13C NMR of aza-BODIPY 3**


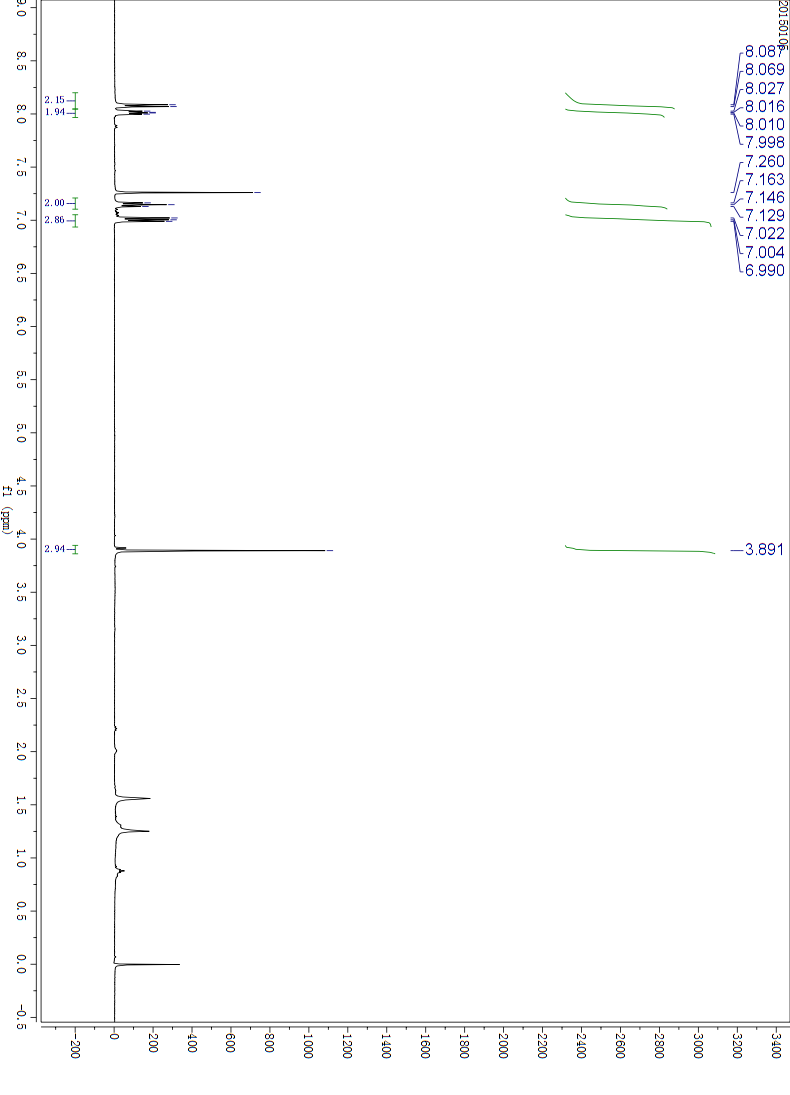


**1H NMR of aza-BODIPY 4**


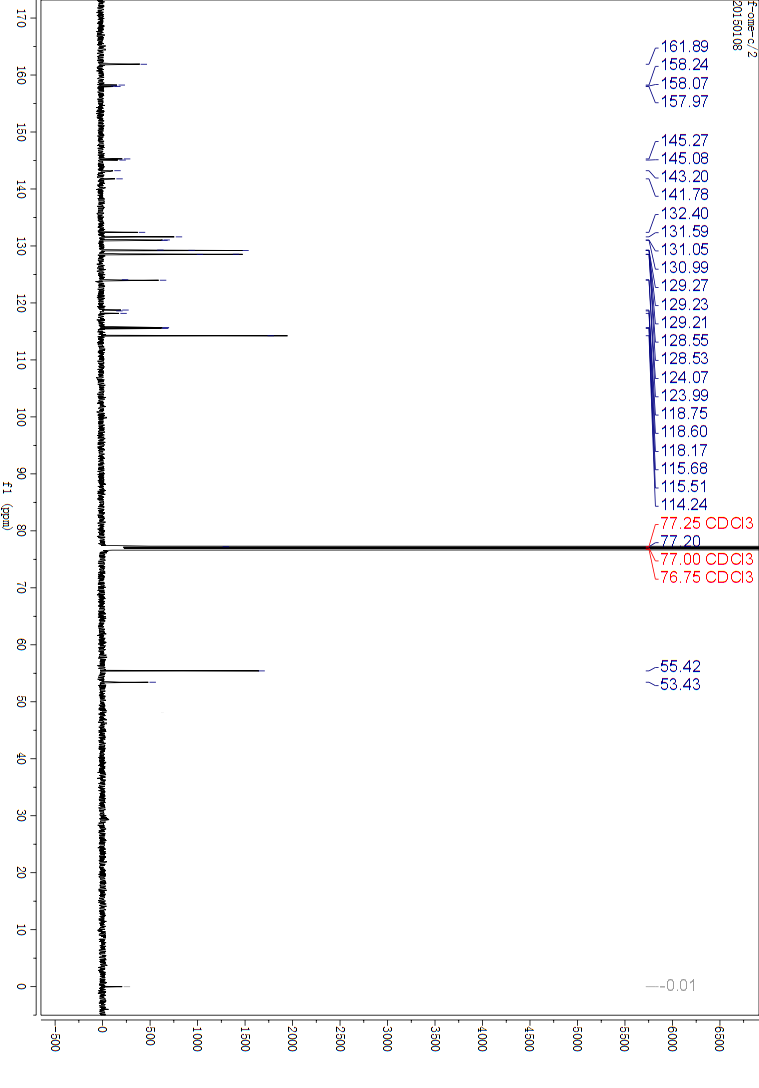


**13C NMR of aza-BODIPY 4**


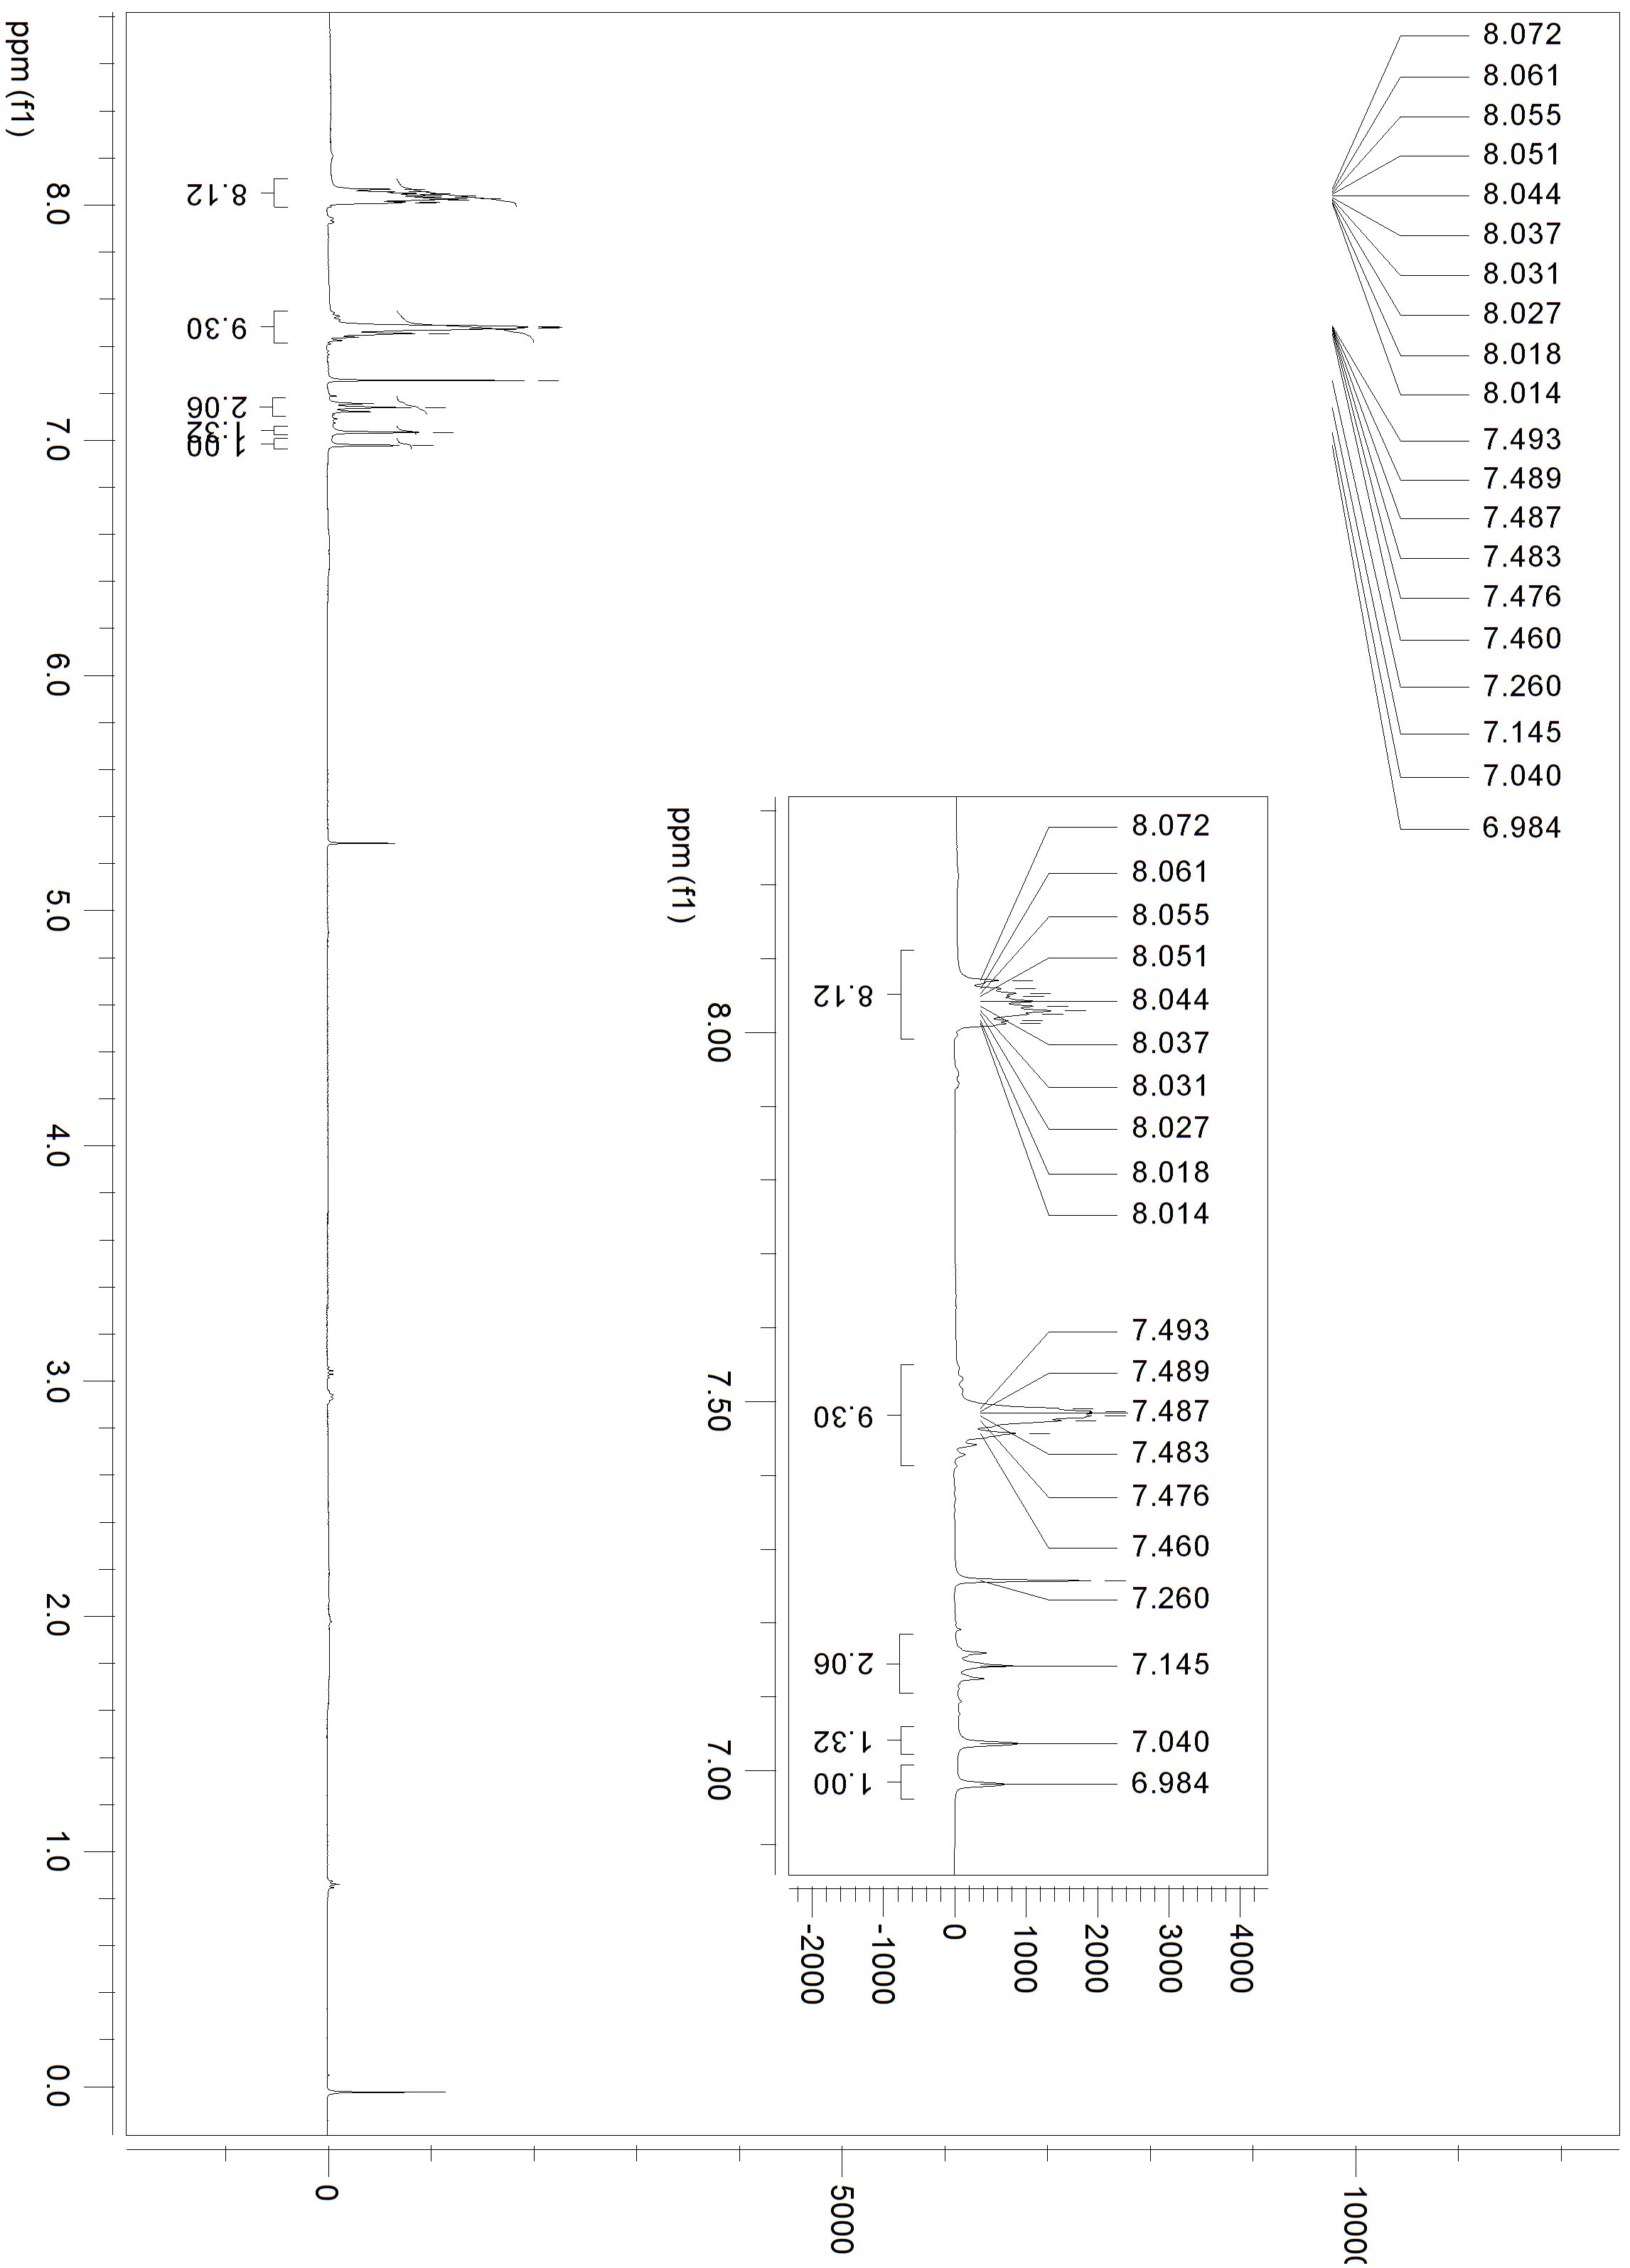


**1H NMR of aza-BODIPY 5**


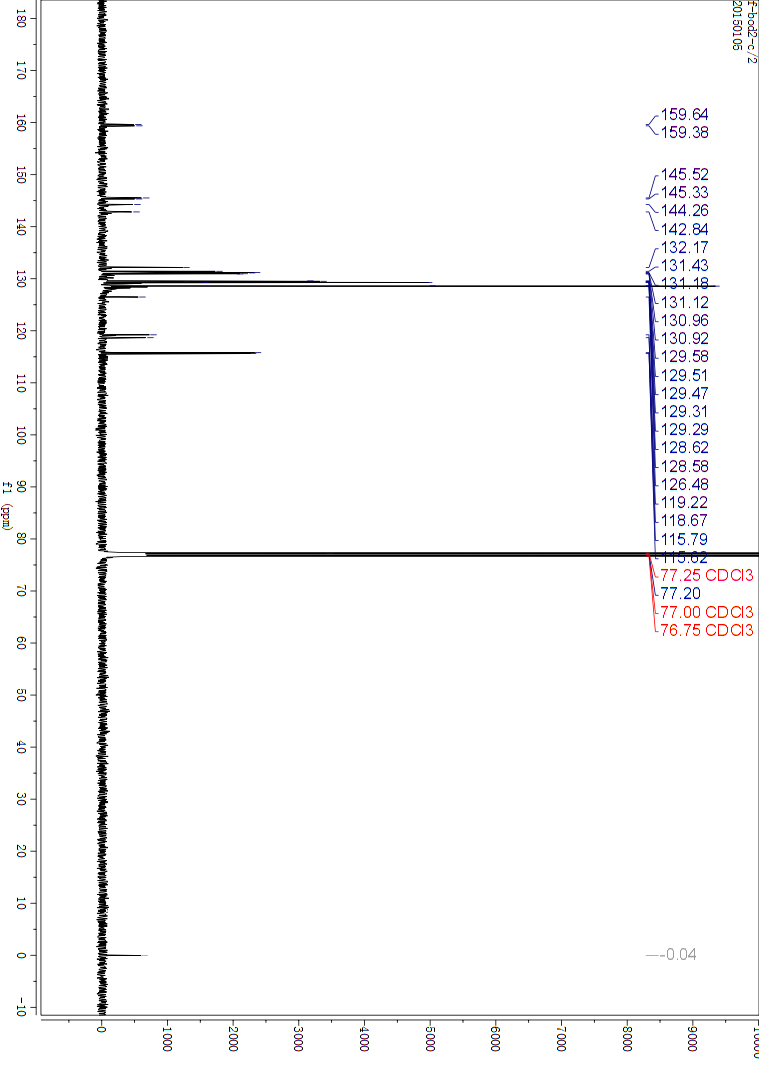


**13C NMR of aza-BODIPY 5**


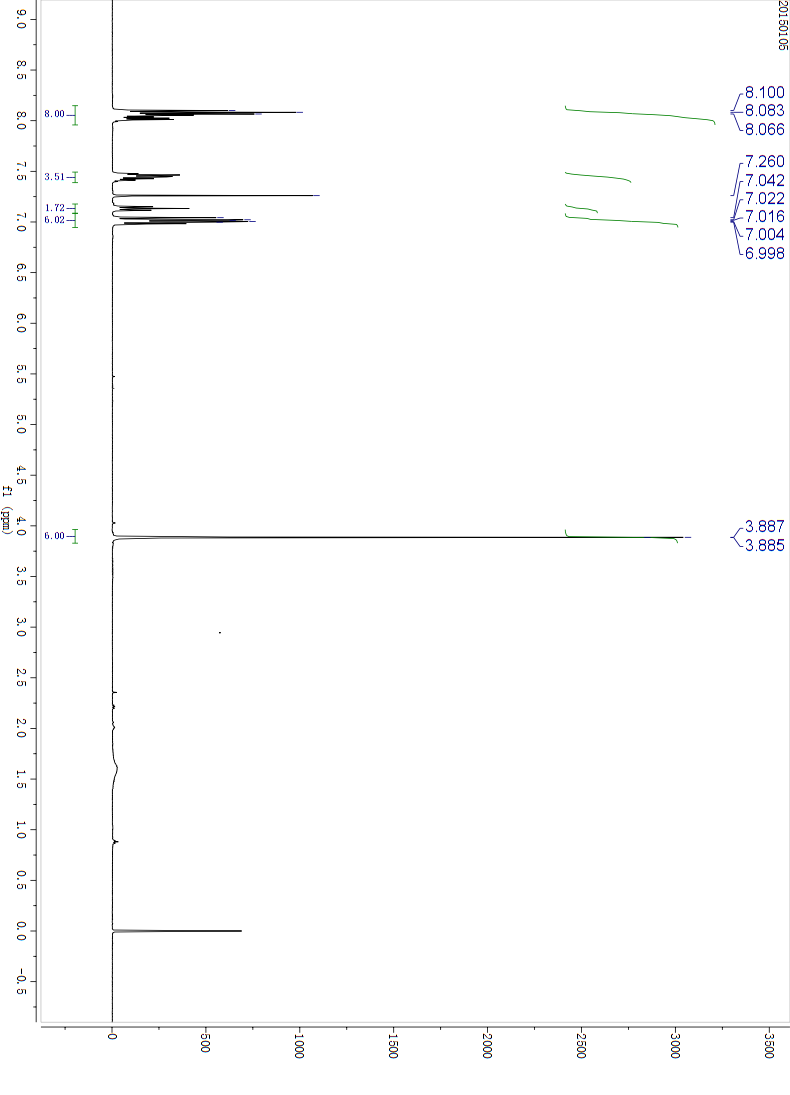


**1H NMR of aza-BODIPY 6**


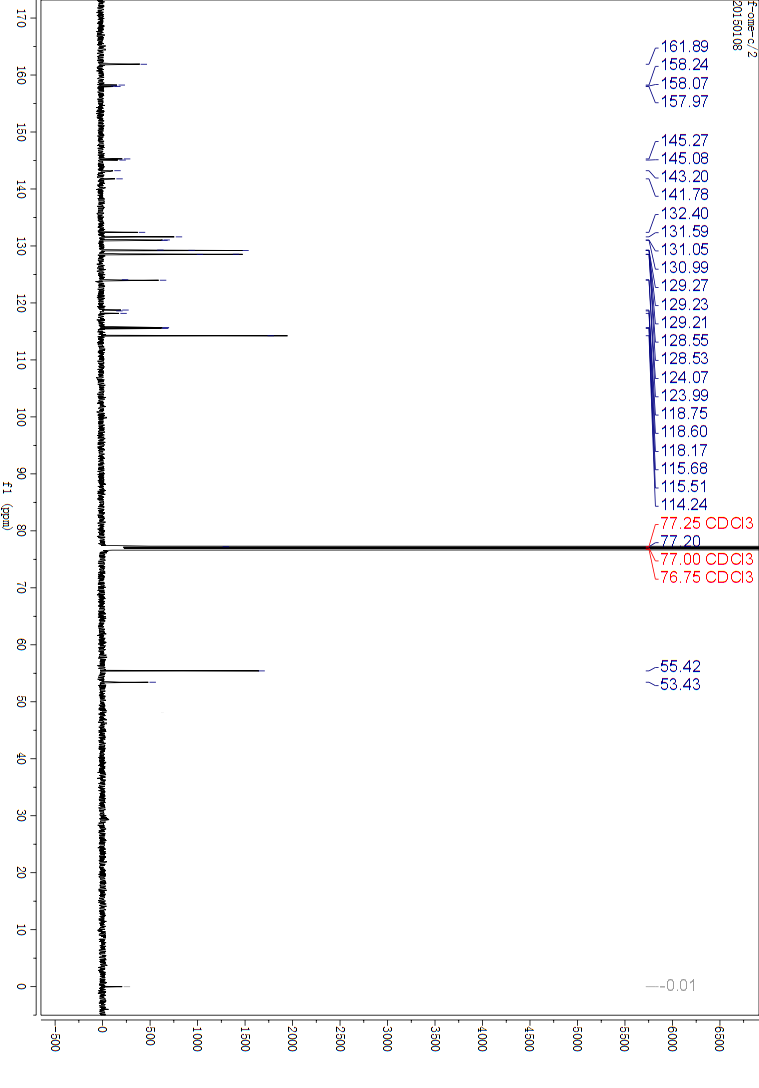


**13C NMR of aza-BODIPY 6**


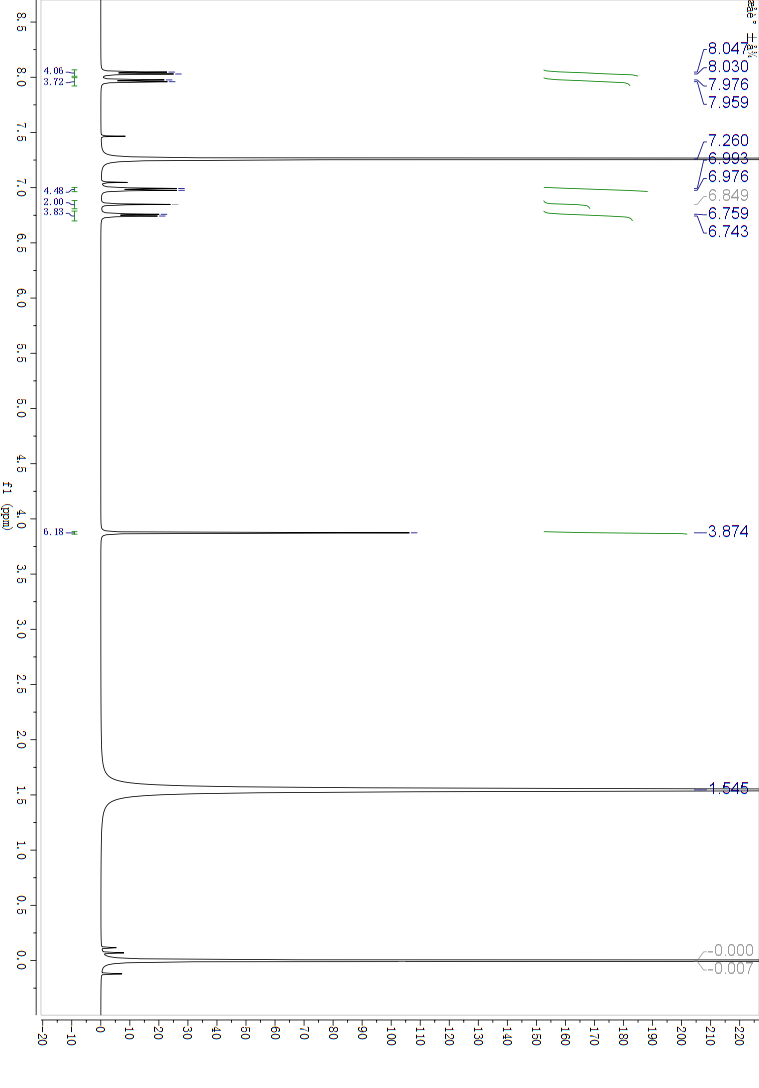


**1H NMR of aza-BODIPY 9**

**
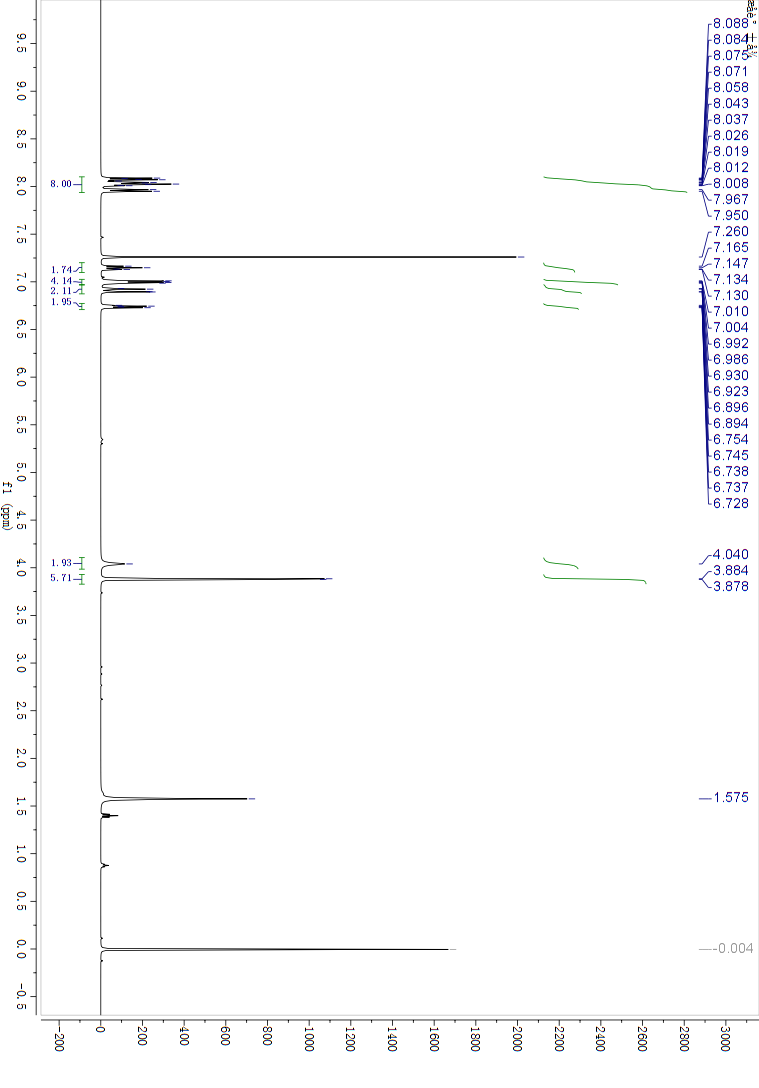
**

**1H NMR of aza-BODIPY 10**

**2. HRMS**

**
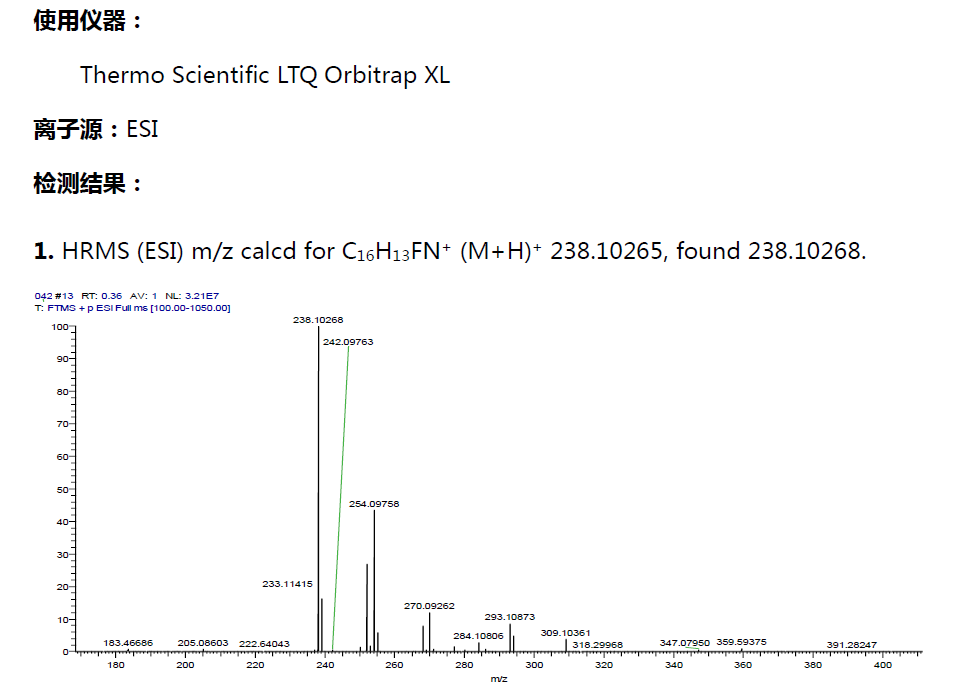
**

**HRMS for 1**

**
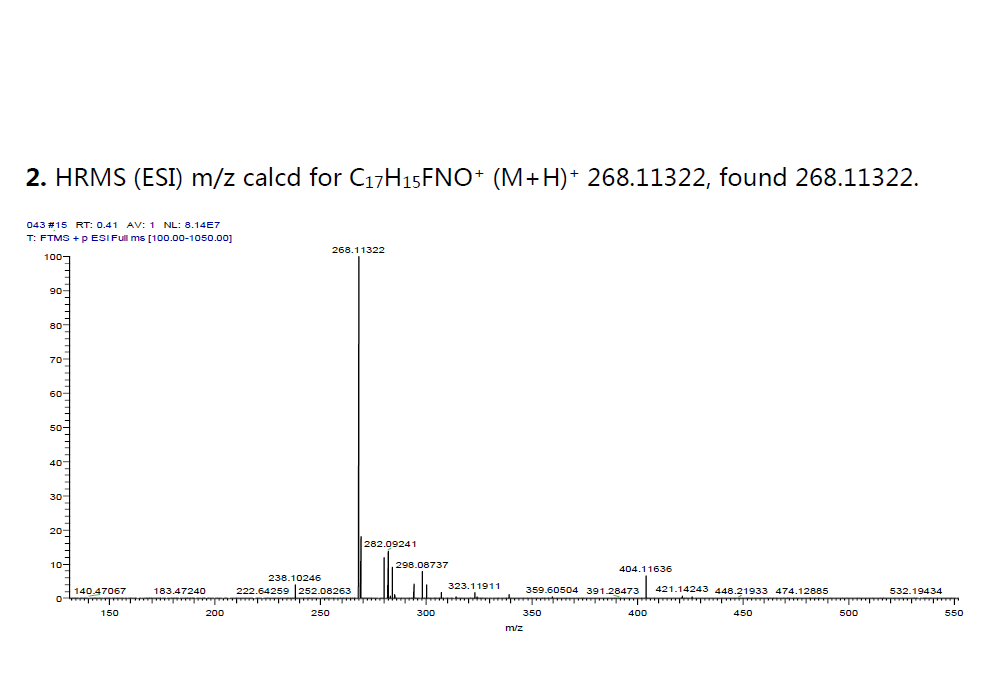
**

**HRMS for 2**

**HRMS for 3**

**
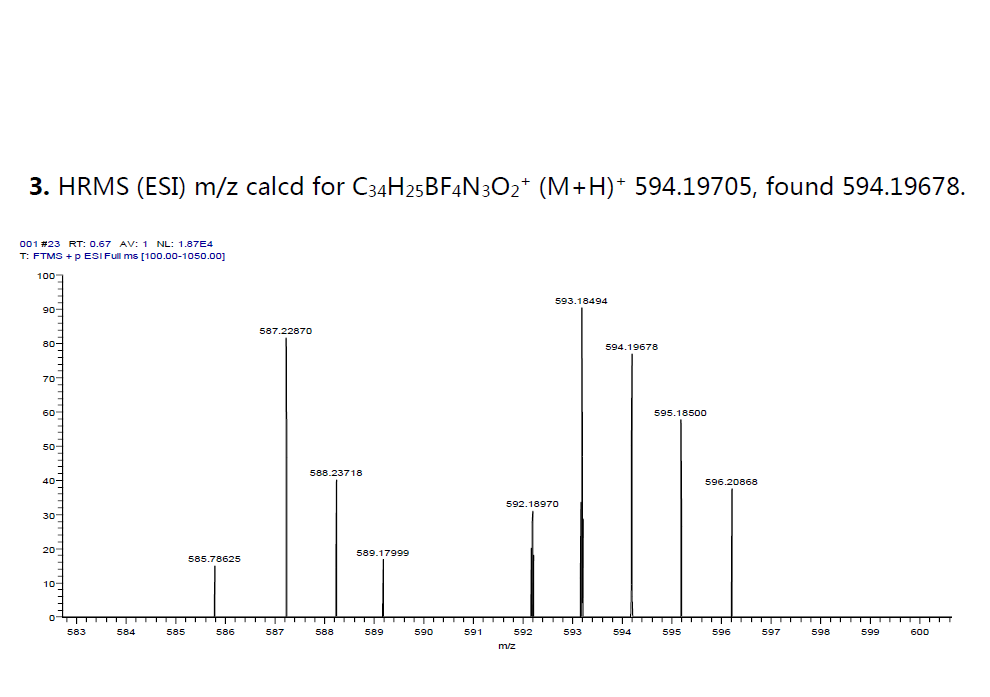
**

**HRMS for 4**

**
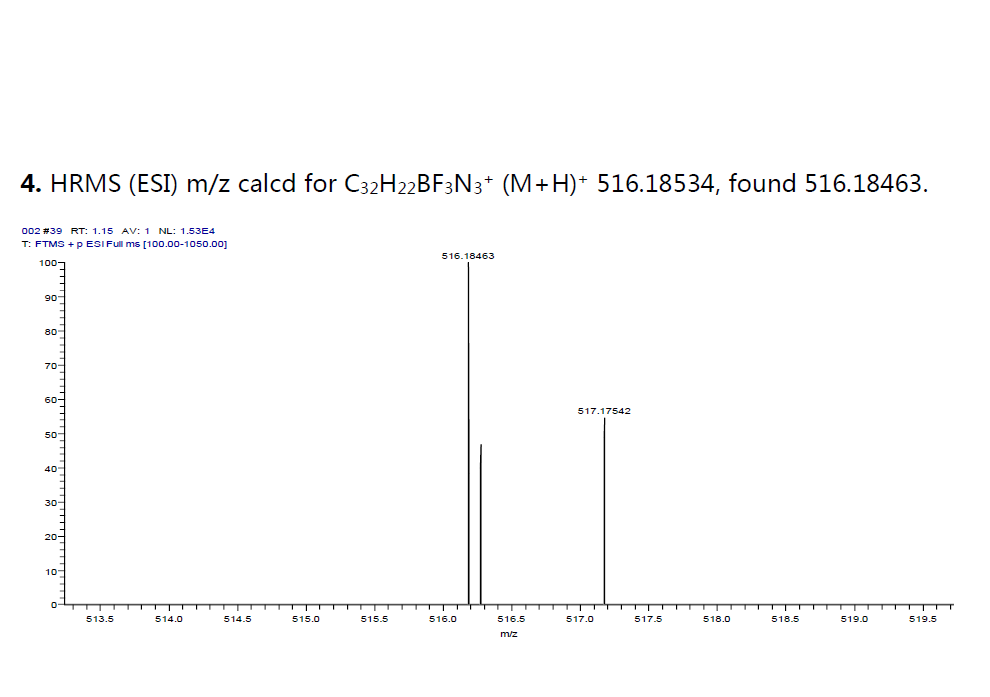
**

**HRMS for 5**

**HRMS for 6**

**
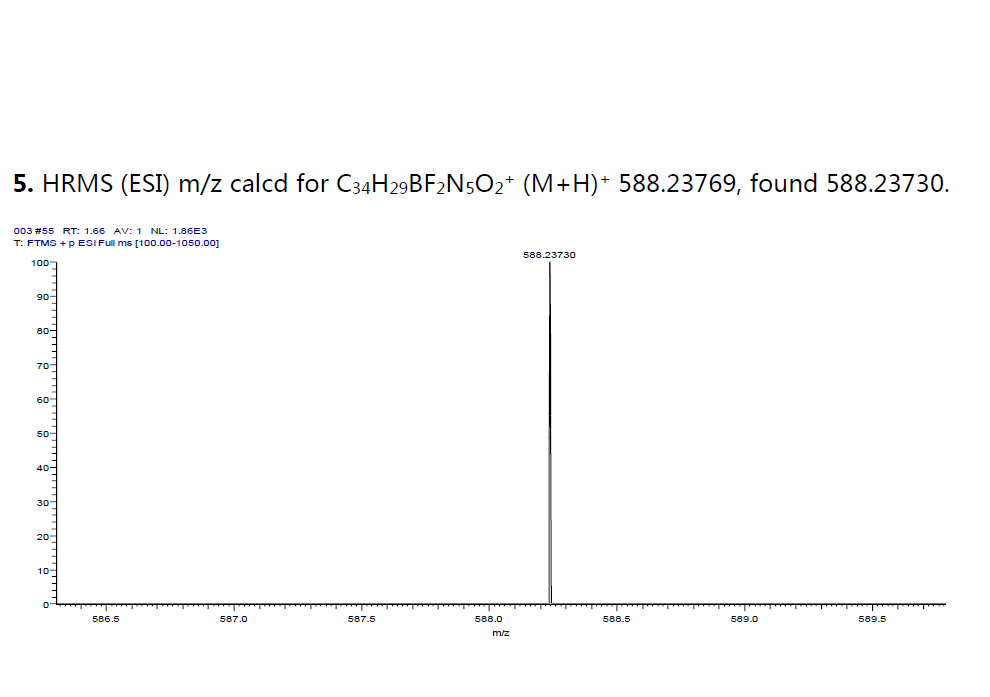
**

**HRMS for 9**

**
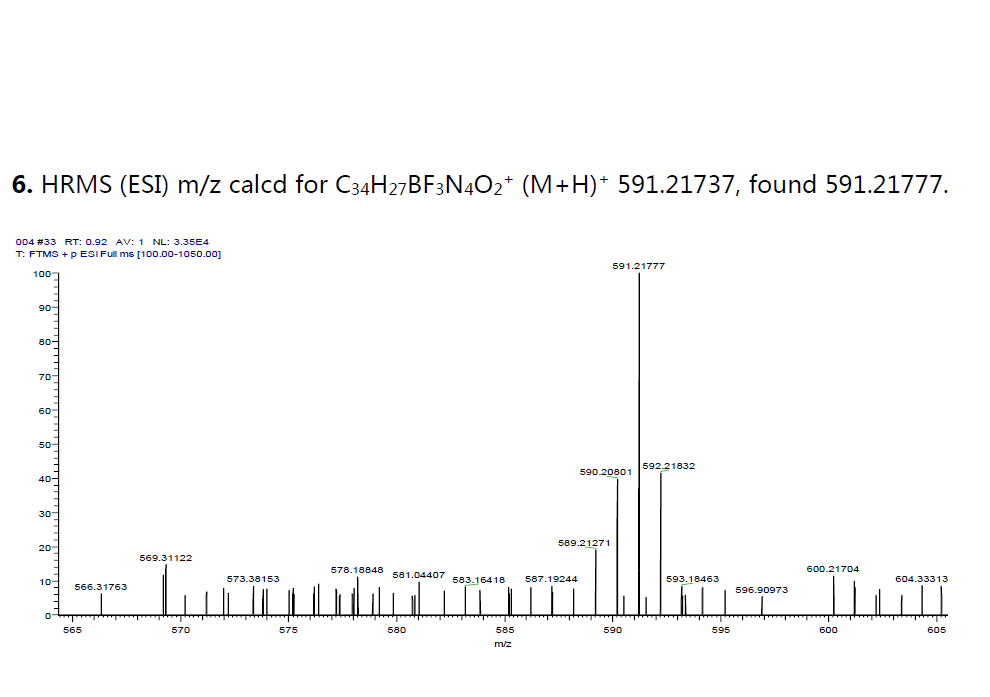
**

**HRMS for 10**

**3. X-ray single crystal diffraction data of 4**

Crystals suitable for the X-ray structural determination were mounted on a Mac Science DIP2030 imaging plate diffractometer and irradiated with graphite monochromated Mo-*K* radiation (** = 0.71073 Å) for the data collection. The unit cell parameters were determined by separately autoindexing several images in each data set using the DENZO program (MAC Science). For each data set, the rotation images were collected in 3 degree increments with a total rotation of 180 deg about the ** axis. The data were processed using SCALEPACK. The structures were solved by a direct method with the SHELX-97 program. Refinement on *F*2 was carried out using the full-matrix least-squares by the SHELX-97 program. All non-hydrogen atoms were refined using the anisotropic thermal parameters. The hydrogen atoms were included in the refinement along with the isotropic thermal parameters (Table S1-S5).


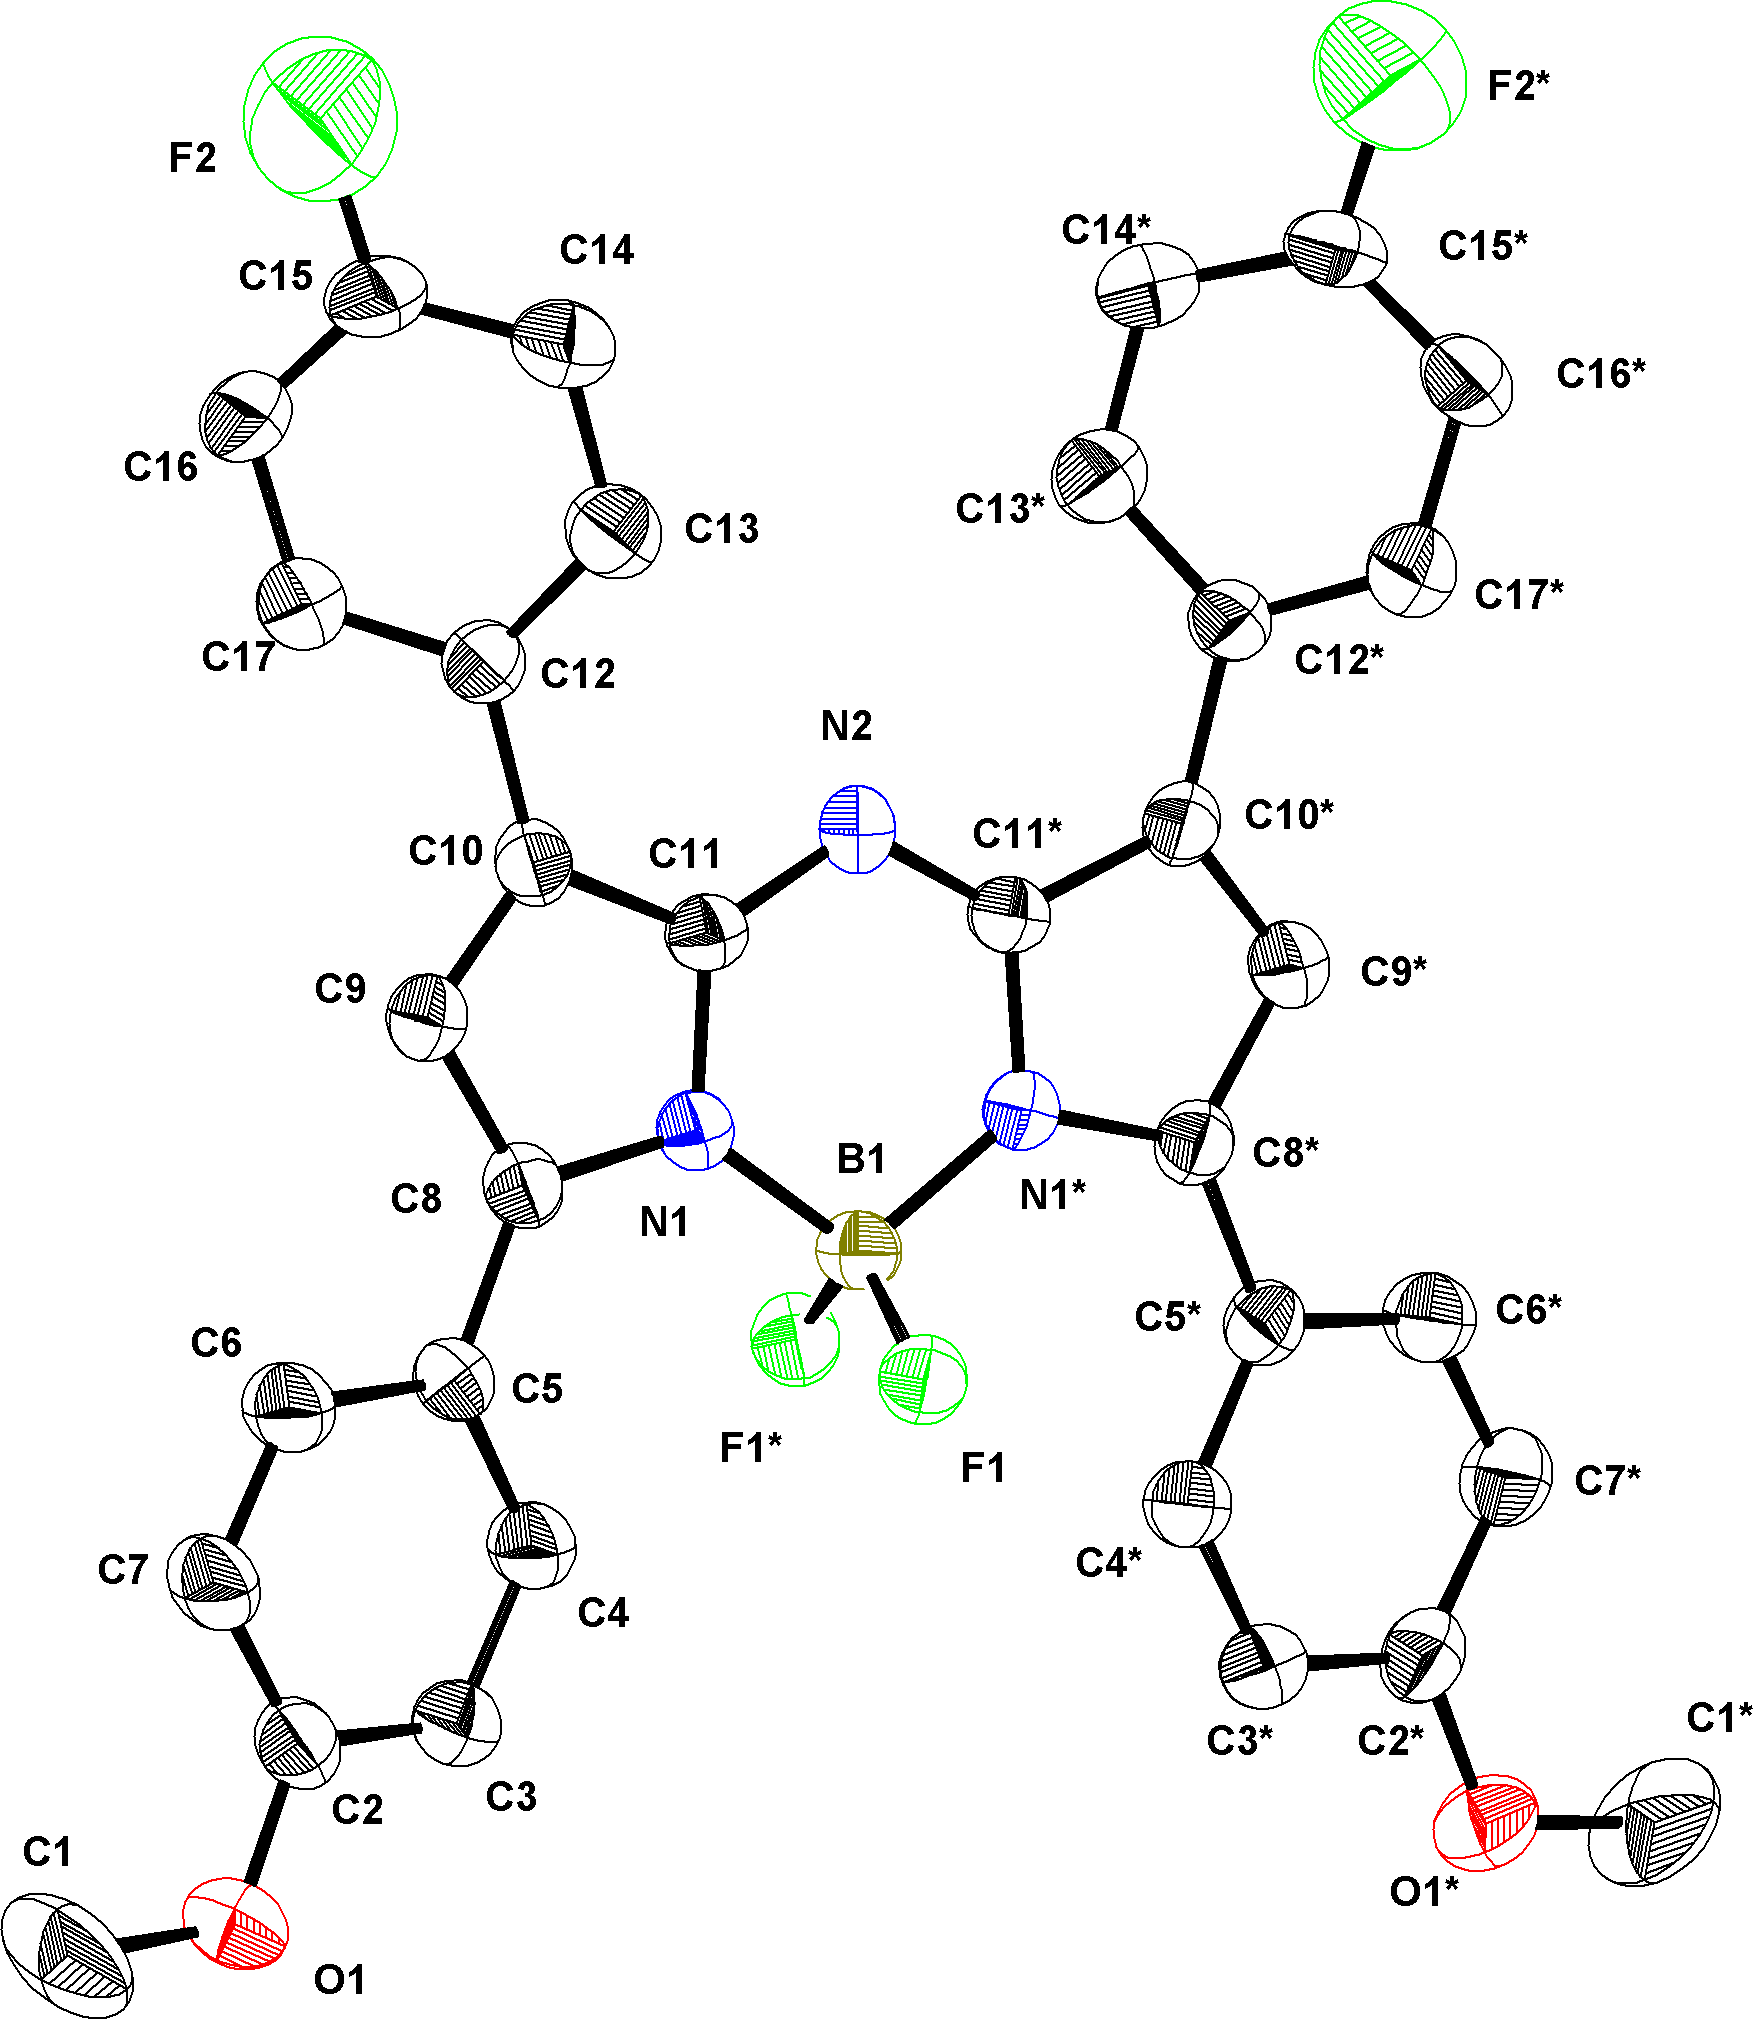


Table S1. Crystal data and structure refinement.

Identification code shelx

Empirical formula C34 H24 B F4 N3 O2

Formula weight 593.37

Temperature 293(2) K

Wavelength 0.71073 Å

Crystal system ?

Space group Ia-3d

Unit cell dimensions a = 16.1853(2) Å = 90°.

b = 16.1853(2) Å = 90°.

c = 19.9274(6) Å  = 90°.

Volume 5220.26(18) Å3

Z 48

Density (calculated) 9.060 Mg/m3

Absorption coefficient 0.683 mm-1

F(000) 14688

Crystal size 0.40 x 0.30 x 0.20 mm3

Theta range for data collection 3.24 to 28.38°.

Index ranges -21<=h<=21, -21<=k<=21, -26<=l<=26

Reflections collected 23013

Independent reflections 3276 [R(int) = 0.0867]

Completeness to theta = 28.38° 99.8 %

Max. and min. transmission 0.8756 and 0.7719

Refinement method Full-matrix least-squares on F2

Data / restraints / parameters 3276 / 0 / 202

Goodness-of-fit on F2 2.181

Final R indices [I>2sigma(I)] R1 = 0.1437, wR2 = 0.3623

R indices (all data) R1 = 0.1832, wR2 = 0.4016

Extinction coefficient 0.0002(6)

Largest diff. peak and hole 1.077 and -0.724 e.Å-3

Table S2. Atomic coordinates (Å x 104) and equivalent isotropic displacement parameters (Å2x 103). U(eq) is defined as one third of the trace of the orthogonalized Uij tensor.

________________________________________________________________________________

x y z U(eq)

________________________________________________________________________________

F(1) 4356(2) 2252(2) 52(1) 68(1)

N(1) 4724(2) 3202(2) 885(2) 56(1)

N(2) 5000 2500 1895(2) 57(1)

C(11) 4754(3) 3150(3) 1568(2) 57(1)

C(8) 4405(3) 3946(3) 732(2) 58(1)

C(5) 4206(3) 4249(3) 81(2) 59(1)

C(10) 4471(3) 3893(3) 1848(2) 59(1)

O(1) 3564(2) 5205(2) -1736(2) 89(1)

C(9) 4269(3) 4355(3) 1333(2) 65(1)

C(12) 4440(3) 4104(3) 2551(2) 60(1)

C(2) 3755(3) 4932(3) -1130(2) 69(1)

C(3) 4209(3) 4242(3) -1115(2) 72(1)

C(4) 4431(3) 3912(3) -523(2) 71(1)

C(6) 3730(3) 4966(3) 42(2) 79(1)

C(15) 4374(4) 4560(4) 3832(2) 87(2)

C(13) 4194(3) 3561(3) 3029(3) 79(1)

C(17) 4604(3) 4870(3) 2739(3) 85(2)

C(7) 3504(4) 5296(3) -541(2) 81(2)

B(1) 5000 2500 432(3) 55(2)

C(16) 4576(4) 5107(3) 3395(3) 90(2)

C(14) 4152(4) 3771(4) 3686(2) 88(2)

F(2) 4452(7) 4791(5) 4443(4) 270(4)

C(1) 3093(6) 5936(5) -1790(4) 142(3)

________________________________________________________________________________

Table S3. Bond lengths [Å] and angles [°].

_____________________________________________________

F(1)-B(1) 1.349(4)

N(1)-C(8) 1.344(5)

N(1)-C(11) 1.365(5)

N(1)-B(1) 1.518(5)

N(2)-C(11) 1.301(5)

N(2)-C(11)#1 1.301(5)

C(11)-C(10) 1.403(6)

C(8)-C(9) 1.387(6)

C(8)-C(5) 1.425(6)

C(5)-C(4) 1.370(6)

C(5)-C(6) 1.396(6)

C(10)-C(9) 1.311(6)

C(10)-C(12) 1.442(6)

O(1)-C(2) 1.322(5)

O(1)-C(1) 1.411(8)

C(12)-C(17) 1.322(7)

C(12)-C(13) 1.356(7)

C(2)-C(3) 1.338(7)

C(2)-C(7) 1.376(7)

C(3)-C(4) 1.343(6)

C(6)-C(7) 1.330(6)

C(15)-F(2) 1.278(9)

C(15)-C(16) 1.285(8)

C(15)-C(14) 1.357(8)

C(13)-C(14) 1.355(7)

C(17)-C(16) 1.363(7)

B(1)-F(1)#1 1.349(4)

B(1)-N(1)#1 1.518(5)

C(8)-N(1)-C(11) 107.1(3)

C(8)-N(1)-B(1) 130.5(3)

C(11)-N(1)-B(1) 122.4(3)

C(11)-N(2)-C(11)#1 119.8(5)

N(2)-C(11)-N(1) 124.1(4)

N(2)-C(11)-C(10) 126.4(4)

N(1)-C(11)-C(10) 109.5(4)

N(1)-C(8)-C(9) 107.1(4)

N(1)-C(8)-C(5) 126.9(4)

C(9)-C(8)-C(5) 125.9(4)

C(4)-C(5)-C(6) 115.4(4)

C(4)-C(5)-C(8) 127.1(4)

C(6)-C(5)-C(8) 117.4(4)

C(9)-C(10)-C(11) 105.0(4)

C(9)-C(10)-C(12) 128.1(4)

C(11)-C(10)-C(12) 126.9(4)

C(2)-O(1)-C(1) 118.4(5)

C(10)-C(9)-C(8) 111.3(4)

C(17)-C(12)-C(13) 117.9(5)

C(17)-C(12)-C(10) 119.3(4)

C(13)-C(12)-C(10) 122.6(4)

O(1)-C(2)-C(3) 115.4(5)

O(1)-C(2)-C(7) 124.6(5)

C(3)-C(2)-C(7) 120.0(4)

C(2)-C(3)-C(4) 119.9(5)

C(3)-C(4)-C(5) 122.8(4)

C(7)-C(6)-C(5) 122.3(5)

F(2)-C(15)-C(16) 114.7(7)

F(2)-C(15)-C(14) 120.4(6)

C(16)-C(15)-C(14) 124.7(5)

C(14)-C(13)-C(12) 122.0(5)

C(12)-C(17)-C(16) 121.9(5)

C(6)-C(7)-C(2) 119.5(5)

F(1)-B(1)-F(1)#1 111.8(5)

F(1)-B(1)-N(1) 109.19(16)

F(1)#1-B(1)-N(1) 109.74(16)

F(1)-B(1)-N(1)#1 109.74(16)

F(1)#1-B(1)-N(1)#1 109.18(16)

N(1)-B(1)-N(1)#1 107.1(5)

C(15)-C(16)-C(17) 117.7(5)

C(13)-C(14)-C(15) 115.5(5)

_____________________________________________________________

Symmetry transformations used to generate equivalent atoms:

#1 -x+1,-y+1/2,z+0

Table S4. Anisotropic displacement parameters (Å2x 103). The anisotropic displacement factor exponent takes the form: -22[ h2a*2U11 + ... + 2 h k a* b* U12 ]

______________________________________________________________________________

U11 U22 U33 U23 U13 U12

______________________________________________________________________________

F(1) 69(2) 65(2) 70(2) -1(1) -10(1) 2(1)

N(1) 65(2) 49(2) 53(2) 2(1) 1(2) 3(1)

N(2) 58(3) 48(2) 65(3) 0 0 0(2)

C(11) 64(2) 57(2) 48(2) -1(2) 1(2) 3(2)

C(8) 61(2) 53(2) 61(2) 4(2) 4(2) 3(2)

C(5) 65(2) 54(2) 59(2) 5(2) -6(2) 7(2)

C(10) 65(3) 49(2) 61(2) 4(2) 6(2) 1(2)

O(1) 103(3) 92(3) 72(2) 16(2) -15(2) 6(2)

C(9) 77(3) 54(2) 63(2) -2(2) 2(2) 7(2)

C(12) 66(3) 58(2) 56(2) -1(2) 6(2) 7(2)

C(2) 72(3) 61(3) 73(3) 11(2) -8(2) -2(2)

C(3) 88(3) 66(3) 60(2) 3(2) 4(2) 4(2)

C(4) 86(3) 64(3) 62(3) 2(2) 1(2) 15(2)

C(6) 99(4) 71(3) 66(3) 1(2) -1(3) 27(3)

C(15) 123(5) 88(4) 51(2) -10(3) 9(3) 15(3)

C(13) 86(4) 76(3) 74(3) 5(2) 3(3) 4(3)

C(17) 115(4) 67(3) 71(3) 2(2) -6(3) 7(3)

C(7) 94(4) 70(3) 78(3) 11(3) -5(3) 29(3)

B(1) 53(3) 61(4) 52(3) 0 0 8(3)

C(16) 133(5) 69(3) 68(3) -14(3) -4(3) 21(3)

C(14) 111(4) 89(4) 62(3) 7(3) 10(3) 0(3)

F(2) 415(14) 190(7) 204(7) -10(6) 73(7) 67(8)

C(1) 156(8) 139(6) 132(6) 54(5) -13(5) 64(6)

______________________________________________________________________________

Table S5. Hydrogen coordinates (Å x 104) and isotropic displacement parameters (Å2x 103).

________________________________________________________________________________

x y z U(eq)

________________________________________________________________________________

H(9) 4060 4889 1367 78

H(3) 4370 3990 -1513 86

H(4) 4752 3436 -524 85

H(6) 3565 5222 438 94

H(13) 4050 3027 2902 95

H(17) 4743 5259 2414 101

H(7) 3179 5770 -549 97

H(16) 4698 5646 3522 108

H(14) 3983 3401 4015 105

H(1A) 3426 6401 -1664 213

H(1B) 2622 5901 -1498 213

H(1C) 2909 6003 -2245 213

________________________________________________________________________________

Table S6. Torsion angles [°].

________________________________________________________________

C(11)#1-N(2)-C(11)-N(1) 0.8(3)

C(11)#1-N(2)-C(11)-C(10) 179.9(5)

C(8)-N(1)-C(11)-N(2) 177.2(4)

B(1)-N(1)-C(11)-N(2) -1.5(6)

C(8)-N(1)-C(11)-C(10) -2.0(5)

B(1)-N(1)-C(11)-C(10) 179.2(3)

C(11)-N(1)-C(8)-C(9) 2.1(5)

B(1)-N(1)-C(8)-C(9) -179.3(3)

C(11)-N(1)-C(8)-C(5) -175.4(4)

B(1)-N(1)-C(8)-C(5) 3.3(7)

N(1)-C(8)-C(5)-C(4) -12.5(8)

C(9)-C(8)-C(5)-C(4) 170.5(5)

N(1)-C(8)-C(5)-C(6) 167.4(5)

C(9)-C(8)-C(5)-C(6) -9.6(7)

N(2)-C(11)-C(10)-C(9) -178.1(4)

N(1)-C(11)-C(10)-C(9) 1.1(5)

N(2)-C(11)-C(10)-C(12) 3.8(7)

N(1)-C(11)-C(10)-C(12) -176.9(4)

C(11)-C(10)-C(9)-C(8) 0.2(6)

C(12)-C(10)-C(9)-C(8) 178.2(5)

N(1)-C(8)-C(9)-C(10) -1.4(6)

C(5)-C(8)-C(9)-C(10) 176.0(4)

C(9)-C(10)-C(12)-C(17) -34.6(8)

C(11)-C(10)-C(12)-C(17) 143.0(5)

C(9)-C(10)-C(12)-C(13) 140.8(5)

C(11)-C(10)-C(12)-C(13) -41.5(7)

C(1)-O(1)-C(2)-C(3) -179.4(6)

C(1)-O(1)-C(2)-C(7) 2.2(8)

O(1)-C(2)-C(3)-C(4) -179.6(5)

C(7)-C(2)-C(3)-C(4) -1.2(8)

C(2)-C(3)-C(4)-C(5) 0.7(8)

C(6)-C(5)-C(4)-C(3) -0.4(8)

C(8)-C(5)-C(4)-C(3) 179.5(5)

C(4)-C(5)-C(6)-C(7) 0.5(8)

C(8)-C(5)-C(6)-C(7) -179.4(5)

C(17)-C(12)-C(13)-C(14) -3.2(8)

C(10)-C(12)-C(13)-C(14) -178.6(5)

C(13)-C(12)-C(17)-C(16) 3.6(8)

C(10)-C(12)-C(17)-C(16) 179.2(5)

C(5)-C(6)-C(7)-C(2) -1.0(9)

O(1)-C(2)-C(7)-C(6) 179.6(5)

C(3)-C(2)-C(7)-C(6) 1.3(8)

C(8)-N(1)-B(1)-F(1) -59.0(5)

C(11)-N(1)-B(1)-F(1) 119.5(4)

C(8)-N(1)-B(1)-F(1)#1 63.8(5)

C(11)-N(1)-B(1)-F(1)#1 -117.7(4)

C(8)-N(1)-B(1)-N(1)#1 -177.8(4)

C(11)-N(1)-B(1)-N(1)#1 0.7(3)

F(2)-C(15)-C(16)-C(17) 172.1(7)

C(14)-C(15)-C(16)-C(17) -3.1(10)

C(12)-C(17)-C(16)-C(15) -0.6(9)

C(12)-C(13)-C(14)-C(15) -0.2(8)

F(2)-C(15)-C(14)-C(13) -171.5(8)

C(16)-C(15)-C(14)-C(13) 3.4(10)

________________________________________________________________

Symmetry transformations used to generate equivalent atoms:

#1 -x+1,-y+1/2,z+0

**4. Ground state geometries in gas phase (M062X/6-311+G(2d,p))**

**Compound 3** E= -1819.96788515 a.u.

5 -2.0188870 0.0138560 0.3350060

9 -3.0272740 0.0012940 -0.5961060

9 -2.5129360 0.0474810 1.6404940

7 -1.0960220 -1.2445260 0.1814100

6 0.2921760 -1.1519410 0.2082710

7 0.9587420 -0.0164310 0.1877800

6 0.3141300 1.1296400 0.1231910

7 -1.0732940 1.2479980 0.1240010

6 -1.4122420 -2.5482270 0.0326460

6 -0.2245080 -3.3207940 -0.0368340

6 0.8550800 -2.4661510 0.0929870

6 -1.3685150 2.5540520 -0.0447040

6 -0.1679310 3.3023500 -0.1490980

6 0.8988090 2.4297490 -0.0378740

6 2.2809550 -2.7960780 0.0727170

6 2.7155920 -3.9553720 -0.5873310

1 1.9928900 -4.5834250 -1.0990190

6 4.0601840 -4.2989880 -0.6222400

1 4.4100290 -5.1879280 -1.1347680

6 4.9720160 -3.4661390 0.0107130

6 4.5830720 -2.3120230 0.6749250

1 5.3303210 -1.6962980 1.1631050

6 3.2337860 -1.9825340 0.7069900

1 2.9134640 -1.0898400 1.2313400

6 2.3286280 2.7507620 -0.0571120

6 3.2955780 1.8170870 -0.4643660

1 2.9875520 0.8267220 -0.7775630

6 4.6442640 2.1506470 -0.4747810

1 5.4015070 1.4413710 -0.7902960

6 5.0203160 3.4260920 -0.0804410

6 4.0950040 4.3777020 0.3237250

1 4.4337530 5.3607660 0.6305750

6 2.7507290 4.0310130 0.3327110

1 2.0179190 4.7575270 0.6699120

6 -2.7698250 -3.0990940 -0.0335910

6 -2.9885080 -4.2258970 -0.8405540

6 -4.2485860 -4.8060200 -0.9151610

1 -4.4074570 -5.6692630 -1.5533020

6 -5.3039470 -4.2761640 -0.1747830

6 -5.0912000 -3.1640110 0.6377100

1 -5.9081720 -2.7550160 1.2234600

6 -3.8347450 -2.5740630 0.7112450

1 -3.6713140 -1.7222550 1.3599050

6 -2.7165050 3.1278230 -0.1253640

6 -2.9140810 4.2366160 -0.9625800

6 -4.1631740 4.8375490 -1.0546580

1 -4.3052180 5.6858690 -1.7163550

6 -5.2291240 4.3473350 -0.3022430

6 -5.0374720 3.2537180 0.5398660

1 -5.8623730 2.8751300 1.1349020

6 -3.7920930 2.6428740 0.6312440

1 -3.6460660 1.8058900 1.3025780

1 -2.0896060 4.6089000 -1.5630850

1 -2.1709050 -4.6289810 -1.4305910

1 -0.1258300 4.3736710 -0.2877690

1 -0.2011370 -4.3993820 -0.1079480

9 6.3217680 3.7514770 -0.0896120

1 -6.2884870 -4.7298990 -0.2294940

1 -6.2050900 4.8174110 -0.3708510

9 6.2734970 -3.7889890 -0.0207170

**Compound 4** E= -2049.00336427 a.u.

5 -1.3053530 0.0084970 0.4414670

9 -2.3325010 -0.0000150 -0.4713860

9 -1.7812100 0.0373940 1.7554680

7 -0.3893860 -1.2500670 0.2669160

6 0.9990330 -1.1578480 0.2497870

7 1.6662870 -0.0229310 0.2131600

6 1.0201350 1.1236980 0.1749680

7 -0.3664650 1.2435030 0.2191270

6 -0.7132420 -2.5547170 0.1256580

6 0.4741620 -3.3258650 0.0169240

6 1.5566540 -2.4716160 0.1126310

6 -0.6678160 2.5522150 0.0674590

6 0.5326270 3.2983160 -0.0687700

6 1.6002680 2.4239010 0.0036240

6 2.9815560 -2.8020070 0.0459330

6 3.3952810 -3.9585820 -0.6318780

1 2.6566430 -4.5847320 -1.1228110

6 4.7382340 -4.3021580 -0.7106500

1 5.0715080 -5.1892070 -1.2373730

6 5.6698110 -3.4717240 -0.1040610

6 5.3020510 -2.3201960 0.5762910

1 6.0644150 -1.7058620 1.0424310

6 3.9543090 -1.9910290 0.6524690

1 3.6505290 -1.0997820 1.1889790

6 3.0298350 2.7436710 -0.0558640

6 3.9824480 1.8126350 -0.5008980

1 3.6630810 0.8251800 -0.8119710

6 5.3308660 2.1444620 -0.5500600

1 6.0768490 1.4367620 -0.8946780

6 5.7211000 3.4157980 -0.1565660

6 4.8102310 4.3647280 0.2845130

1 5.1597840 5.3445850 0.5896100

6 3.4661770 4.0195240 0.3322410

1 2.7453460 4.7438650 0.6987430

6 -2.0668750 -3.1052050 0.0991910

6 -2.3045050 -4.2559290 -0.6626050

6 -3.5601100 -4.8493440 -0.7143680

1 -3.7082890 -5.7293400 -1.3281250

6 -4.6100100 -4.2935090 0.0228290

6 -4.3832220 -3.1491560 0.8005810

1 -5.2096250 -2.7442820 1.3749400

6 -3.1337550 -2.5618650 0.8378810

1 -2.9716460 -1.6919520 1.4619440

8 -5.8678130 -4.7872380 0.0518850

6 -6.1393700 -5.9469900 -0.7154620

1 -5.9643120 -5.7641040 -1.7811800

1 -5.5254480 -6.7913850 -0.3836780

1 -7.1917690 -6.1752600 -0.5529840

6 -2.0114450 3.1278000 0.0296300

6 -2.2259380 4.2682360 -0.7545960

6 -3.4698820 4.8842870 -0.8209850

1 -3.5996860 5.7548220 -1.4521720

6 -4.5320500 4.3627580 -0.0764090

6 -4.3285850 3.2295290 0.7234750

1 -5.1638300 2.8510090 1.3030330

6 -3.0905360 2.6193490 0.7753940

1 -2.9475130 1.7585960 1.4162160

8 -5.7804540 4.8804440 -0.0606460

6 -6.0284970 6.0290820 -0.8522860

1 -5.8533440 5.8214760 -1.9134500

1 -5.4004630 6.8688710 -0.5355670

1 -7.0770960 6.2795890 -0.6982200

1 -1.4123440 4.6691380 -1.3514590

1 -1.4991350 -4.6835160 -1.2521910

1 0.5744830 4.3707730 -0.1982660

1 0.4974810 -4.4044660 -0.0533070

9 7.0226010 3.7395990 -0.2030500

9 6.9700640 -3.7943040 -0.1783930

**Compound 5** E= -1720.72334179 a.u.

5 -1.7906740 0.3791090 0.3377880

9 -2.7614470 0.6732920 -0.5869760

9 -2.2695680 0.4758930 1.6459610

7 -1.2218180 -1.0660150 0.1174950

6 0.1447270 -1.3346570 0.1180150

7 1.0795610 -0.4102030 0.1838640

6 0.7511150 0.8650830 0.2054450

7 -0.5583690 1.3357570 0.1828330

6 -1.8653500 -2.2394210 -0.0550650

6 -0.9171720 -3.2897250 -0.1592480

6 0.3483750 -2.7456120 -0.0439660

6 -0.5048250 2.6764920 0.0370110

6 0.8488920 3.0930430 -0.0352470

6 1.6529910 1.9743660 0.0895370

6 1.6341800 -3.4508080 -0.0592210

6 1.6859120 -4.7902490 0.3543350

1 0.7804270 -5.2756660 0.7066290

6 2.8868110 -5.4893040 0.3468610

1 2.9100180 -6.5231650 0.6765460

6 4.0581700 -4.8612980 -0.0737660

6 4.0178760 -3.5314720 -0.4883610

1 4.9251250 -3.0377400 -0.8229560

6 2.8178560 -2.8283890 -0.4852290

1 2.7912220 -1.7972320 -0.8175590

6 3.1148210 1.9021420 0.0635860

6 3.8115110 0.8493240 0.6786570

1 3.2614940 0.0687790 1.1909240

6 5.1993440 0.7982850 0.6407710

1 5.7514050 -0.0063330 1.1136390

6 5.8865280 1.8125610 -0.0096880

6 5.2347730 2.8728060 -0.6234690

1 5.8123520 3.6404250 -1.1259260

6 3.8475960 2.9089920 -0.5830390

1 3.3227700 3.7190440 -1.0799930

6 -3.3191810 -2.4184810 -0.1389590

6 -3.8136130 -3.4264920 -0.9807900

6 -5.1799420 -3.6589920 -1.0760200

1 -5.5494230 -4.4327490 -1.7411870

6 -6.0704500 -2.8968420 -0.3219010

6 -5.5857820 -1.9022450 0.5253090

1 -6.2750310 -1.3134750 1.1220700

6 -4.2203540 -1.6590670 0.6196330

1 -3.8501330 -0.8985230 1.2957020

6 -1.6594090 3.5790270 -0.0227300

6 -1.5637640 4.7255060 -0.8258720

6 -2.6162380 5.6299450 -0.8919450

1 -2.5346060 6.5061180 -1.5270150

6 -3.7730740 5.4077910 -0.1469450

6 -3.8704140 4.2768450 0.6615960

1 -4.7655180 4.1057890 1.2509610

6 -2.8241070 3.3640960 0.7267130

1 -2.8982050 2.4977190 1.3724470

1 -0.6695720 4.8907250 -1.4194080

1 -3.1227500 -4.0097440 -1.5819810

1 1.1670900 4.1238980 -0.1052250

1 -1.1707670 -4.3310890 -0.3005900

9 7.2267230 1.7676650 -0.0473140

1 4.9969850 -5.4061470 -0.0783910

1 -7.1381420 -3.0790170 -0.3929190

1 -4.5951740 6.1149240 -0.1951140

**Compound 6** E= -1949.75869866 a.u.

5 -1.1062760 0.1520520 0.4435550

9 -2.1100610 0.4046320 -0.4604470

9 -1.5667080 0.2295880 1.7613570

7 -0.4839410 -1.2669410 0.2112740

6 0.8923930 -1.4759130 0.1660760

7 1.7886700 -0.5122390 0.2028400

6 1.4053200 0.7476600 0.2405760

7 0.0769190 1.1614490 0.2642420

6 -1.0843960 -2.4675360 0.0571510

6 -0.0926320 -3.4748260 -0.0800820

6 1.1505250 -2.8764080 -0.0059380

6 0.0653160 2.5058910 0.1258360

6 1.3988360 2.9789550 0.0118530

6 2.2531120 1.8953630 0.1010280

6 2.4645380 -3.5264100 -0.0636940

6 2.5861030 -4.8639480 0.3411950

1 1.7135170 -5.3884390 0.7194730

6 3.8142880 -5.5122570 0.2919540

1 3.8909000 -6.5455930 0.6153460

6 4.9445190 -4.8343320 -0.1621090

6 4.8351680 -3.5056370 -0.5676880

1 5.7099040 -2.9726410 -0.9277710

6 3.6073570 -2.8534570 -0.5229790

1 3.5270960 -1.8226180 -0.8476250

6 3.7155350 1.8874450 0.0263510

6 4.4785250 0.8653430 0.6137200

1 3.9806660 0.0592130 1.1396060

6 5.8654470 0.8766620 0.5302940

1 6.4680300 0.0960590 0.9813250

6 6.4851050 1.9224320 -0.1377440

6 5.7667880 2.9536320 -0.7257970

1 6.2926860 3.7476540 -1.2437910

6 4.3813200 2.9271320 -0.6401700

1 3.8045220 3.7136420 -1.1169280

6 -2.5258570 -2.7097760 0.0181850

6 -3.0034420 -3.7646880 -0.7696280

6 -4.3578740 -4.0685590 -0.8379560

1 -4.6895350 -4.8817200 -1.4718630

6 -5.2668930 -3.3128100 -0.0916490

6 -4.8015190 -2.2630710 0.7127350

1 -5.5239450 -1.6997470 1.2937080

6 -3.4542910 -1.9634240 0.7664710

1 -3.1116400 -1.1636450 1.4106550

8 -6.6025290 -3.5198850 -0.0779590

6 -7.1153230 -4.5715770 -0.8769880

1 -6.8940700 -4.4048350 -1.9367270

1 -6.7055110 -5.5386460 -0.5658660

1 -8.1936680 -4.5666010 -0.7246000

6 -1.1234900 3.3562280 0.1071450

6 -1.0920770 4.5311350 -0.6539180

6 -2.1750480 5.4012340 -0.6963880

1 -2.1182890 6.2921530 -1.3096690

6 -3.3198170 5.1050070 0.0494530

6 -3.3603040 3.9384390 0.8261360

1 -4.2538820 3.7368750 1.4071730

6 -2.2819750 3.0758910 0.8542680

1 -2.3222880 2.1913790 1.4775890

8 -4.4275710 5.8786390 0.0883350

6 -4.4261420 7.0719140 -0.6755470

1 -4.3069780 6.8563910 -1.7428380

1 -3.6292040 7.7483000 -0.3479010

1 -5.3946380 7.5396080 -0.5042030

1 -0.2137760 4.7596020 -1.2500760

1 -2.3073300 -4.3449030 -1.3676060

1 1.6725690 4.0226140 -0.0573450

1 -0.3030730 -4.5270750 -0.2113840

9 7.8244550 1.9381850 -0.2188570

1 5.9047190 -5.3392380 -0.1993650

**Compound 8** E= -1850.51390976 a.u.

5 -0.9147740 0.0099800 0.4371810

9 -1.9478460 0.0046140 -0.4693430

9 -1.3832000 0.0405250 1.7540870

7 -0.0040940 -1.2512460 0.2572740

6 1.3848300 -1.1637900 0.2312380

7 2.0549010 -0.0306410 0.1917220

6 1.4125390 1.1181170 0.1577440

7 0.0262220 1.2419120 0.2092020

6 -0.3333710 -2.5546730 0.1183510

6 0.8506060 -3.3296070 0.0013730

6 1.9370890 -2.4794690 0.0893910

6 -0.2721840 2.5513040 0.0587780

6 0.9296930 3.2939000 -0.0831980

6 1.9955670 2.4168930 -0.0158560

6 3.3607050 -2.8185460 0.0127550

6 3.7604980 -3.9789610 -0.6661280

1 3.0114890 -4.5987380 -1.1504680

6 5.1037850 -4.3251620 -0.7486940

1 5.3965890 -5.2238420 -1.2824430

6 6.0718720 -3.5153750 -0.1563730

6 5.6859550 -2.3602870 0.5212120

1 6.4339820 -1.7281980 0.9898440

6 4.3420860 -2.0130740 0.6109350

1 4.0460350 -1.1186390 1.1470030

6 3.4261450 2.7357700 -0.0833530

6 4.3744810 1.8057340 -0.5371680

1 4.0511250 0.8192550 -0.8481900

6 5.7217670 2.1472930 -0.5917110

1 6.4430910 1.4174200 -0.9465390

6 6.1454450 3.4163510 -0.2021970

6 5.2105930 4.3481500 0.2462790

1 5.5318330 5.3372170 0.5574400

6 3.8638900 4.0104810 0.3057240

1 3.1428130 4.7315670 0.6795310

6 -1.6893150 -3.1004320 0.1001900

6 -1.9359200 -4.2494130 -0.6612580

6 -3.1939400 -4.8385340 -0.7054530

1 -3.3490410 -5.7173970 -1.3191450

6 -4.2370710 -4.2799460 0.0390850

6 -4.0012840 -3.1372720 0.8165020

1 -4.8225560 -2.7300580 1.3965610

6 -2.7495010 -2.5543100 0.8463100

1 -2.5802980 -1.6854150 1.4699290

8 -5.4966050 -4.7694730 0.0757600

6 -5.7769740 -5.9269120 -0.6917040

1 -5.6082290 -5.7428730 -1.7582680

1 -5.1637580 -6.7739890 -0.3654400

1 -6.8290660 -6.1520330 -0.5228230

6 -1.6145510 3.1306930 0.0279670

6 -1.8300960 4.2711960 -0.7557510

6 -3.0726670 4.8908510 -0.8157040

1 -3.2033290 5.7614900 -1.4465840

6 -4.1322300 4.3727820 -0.0651470

6 -3.9276220 3.2395700 0.7343640

1 -4.7607900 2.8637240 1.3186580

6 -2.6909700 2.6259160 0.7799860

1 -2.5468250 1.7651240 1.4205270

8 -5.3793070 4.8940410 -0.0430490

6 -5.6282660 6.0423770 -0.8346530

1 -5.4592650 5.8331430 -1.8965190

1 -4.9962500 6.8808340 -0.5223020

1 -6.6753450 6.2960690 -0.6754170

1 -1.0184760 4.6694160 -1.3570830

1 -1.1357890 -4.6790990 -1.2564290

1 0.9744190 4.3662190 -0.2127350

1 0.8700870 -4.4081830 -0.0700000

1 7.1978960 3.6784880 -0.2471800

1 7.1215240 -3.7840830 -0.2226090

**Compound 9** E= -2177.67866629 a.u.

5 -1.8822680 0.0262760 0.4515520

9 -2.9023820 0.0057230 -0.4690720

9 -2.3691160 0.0850420 1.7607230

7 -0.9738150 -1.2414000 0.3101760

6 0.4150280 -1.1594760 0.3076780

7 1.0907110 -0.0300580 0.2550570

6 0.4529420 1.1199680 0.1854110

7 -0.9329920 1.2497030 0.2120730

6 -1.3060250 -2.5464590 0.1896960

6 -0.1241720 -3.3280760 0.1096470

6 0.9645660 -2.4801190 0.2025840

6 -1.2241330 2.5573950 0.0301860

6 -0.0183020 3.2926440 -0.1079120

6 1.0437850 2.4130370 -0.0060030

6 2.3856250 -2.8230130 0.1614040

6 2.7997190 -4.0043510 -0.4706160

1 2.0628280 -4.6437770 -0.9472150

6 4.1387400 -4.3608590 -0.5257180

1 4.4339730 -5.2780210 -1.0273110

6 5.0983030 -3.5278140 0.0574070

6 4.7049070 -2.3481380 0.6934860

1 5.4625010 -1.7185210 1.1479820

6 3.3639710 -2.0026380 0.7479260

1 3.0665440 -1.0907430 1.2524410

6 2.4739370 2.7235720 -0.0566800

6 3.4343280 1.7752690 -0.4479660

1 3.1198520 0.7763910 -0.7257900

6 4.7801370 2.1039430 -0.4873030

1 5.5228640 1.3741380 -0.7921460

6 5.1983030 3.3905920 -0.1411700

6 4.2575250 4.3492770 0.2459980

1 4.5709680 5.3515390 0.5238560

6 2.9132410 4.0109010 0.2852910

1 2.1922390 4.7545300 0.6109550

6 -2.6638250 -3.0865180 0.1577090

6 -2.9027000 -4.2486540 -0.5860130

6 -4.1625610 -4.8328040 -0.6407680

1 -4.3114850 -5.7222350 -1.2405880

6 -5.2155810 -4.2555720 0.0751400

6 -4.9877890 -3.0992060 0.8346130

1 -5.8169520 -2.6774120 1.3925680

6 -3.7339960 -2.5213650 0.8748660

1 -3.5712280 -1.6414670 1.4846490

8 -6.4776170 -4.7388850 0.0996480

6 -6.7499290 -5.9107370 -0.6487600

1 -6.5624650 -5.7491460 -1.7158000

1 -6.1458140 -6.7532590 -0.2948780

1 -7.8056480 -6.1282390 -0.4931570

6 -2.5637530 3.1403000 -0.0337170

6 -2.7633670 4.2655910 -0.8432690

6 -4.0025910 4.8880930 -0.9341960

1 -4.1207080 5.7462500 -1.5843700

6 -5.0751710 4.3887150 -0.1893790

6 -4.8867520 3.2708130 0.6353360

1 -5.7299630 2.9095540 1.2143750

6 -3.6532040 2.6541010 0.7117790

1 -3.5219410 1.8058440 1.3715030

8 -6.3202920 4.9146260 -0.1960540

6 -6.5529220 6.0492910 -1.0120750

1 -6.3691260 5.8200590 -2.0673010

1 -5.9221970 6.8908800 -0.7056140

1 -7.6012030 6.3097440 -0.8730090

1 -1.9414840 4.6490030 -1.4402800

1 -2.0945790 -4.6930660 -1.1591610

1 0.0313260 4.3619040 -0.2589490

1 -0.1087220 -4.4079460 0.0606120

7 6.5935850 3.6323920 -0.2118740

7 6.4898880 -3.7977810 0.0533500

7 6.8433560 -4.8430990 -0.5062600

7 6.9676950 4.7722210 0.0903550

7 7.2731860 -5.7673270 -0.9890610

7 7.4153580 5.7758610 0.3444120

**Compound 10** E= -2005.11678847 a.u.

5 -1.3069270 0.0239550 0.4386450

9 -2.3368660 0.0427130 -0.4725540

9 -1.7841970 0.0596430 1.7536190

7 -0.4192180 -1.2501210 0.2594150

6 0.9684350 -1.1885520 0.2454300

7 1.6628550 -0.0616120 0.2115640

6 1.0439340 1.0930360 0.1767420

7 -0.3432010 1.2399330 0.2217540

6 -0.7725080 -2.5501500 0.1177850

6 0.3948660 -3.3429610 0.0117670

6 1.4974020 -2.5077260 0.1087080

6 -0.6160250 2.5549600 0.0774330

6 0.5960890 3.2806560 -0.0540940

6 1.6524970 2.3904140 0.0126590

6 2.9154530 -2.8694820 0.0455720

6 3.3086570 -4.0272790 -0.6419020

1 2.5591740 -4.6321040 -1.1431610

6 4.6446390 -4.3994580 -0.7165660

1 4.9614020 -5.2883760 -1.2504220

6 5.5905300 -3.5961490 -0.0964270

6 5.2435330 -2.4445760 0.5944250

1 6.0157900 -1.8520600 1.0725330

6 3.9024670 -2.0876390 0.6669970

1 3.6145140 -1.1967540 1.2129850

6 3.0790360 2.6888110 -0.0470350

6 4.0420150 1.7283940 -0.4053240

1 3.7261360 0.7213360 -0.6514400

6 5.3872840 2.0503070 -0.4622080

1 6.1122560 1.2923780 -0.7476540

6 5.8306050 3.3495060 -0.1630030

6 4.8738180 4.3151580 0.1948540

1 5.1984750 5.3222890 0.4410640

6 3.5315130 3.9864150 0.2471830

1 2.8161620 4.7471190 0.5464150

6 -2.1409570 -3.0685450 0.0893980

6 -2.4100500 -4.2026830 -0.6855170

6 -3.6791530 -4.7687040 -0.7349050

1 -3.8505220 -5.6377230 -1.3583570

6 -4.7114170 -4.1995830 0.0158930

6 -4.4540670 -3.0700770 0.8047700

1 -5.2675610 -2.6530310 1.3889240

6 -3.1906780 -2.5117070 0.8414260

1 -3.0052080 -1.6521770 1.4734850

8 -5.9811500 -4.6665750 0.0479160

6 -6.2812080 -5.8103210 -0.7314680

1 -6.1095910 -5.6183540 -1.7962980

1 -5.6825150 -6.6715450 -0.4149750

1 -7.3370080 -6.0197180 -0.5648980

6 -1.9482110 3.1568410 0.0393460

6 -2.1380420 4.3051590 -0.7397520

6 -3.3697290 4.9451420 -0.8073930

1 -3.4808570 5.8208800 -1.4349380

6 -4.4439100 4.4406320 -0.0683080

6 -4.2648020 3.3001180 0.7270490

1 -5.1090170 2.9351400 1.3022620

6 -3.0391750 2.6654580 0.7792670

1 -2.9146880 1.7987090 1.4157710

8 -5.6821980 4.9820780 -0.0540960

6 -5.9061710 6.1377540 -0.8425910

1 -5.7314970 5.9304280 -1.9038920

1 -5.2636150 6.9646320 -0.5210750

1 -6.9504050 6.4073120 -0.6910050

1 -1.3149020 4.6929650 -1.3320530

1 -1.6178200 -4.6399240 -1.2859160

1 0.6524410 4.3530230 -0.1762190

1 0.3979290 -4.4220130 -0.0577070

9 6.8848790 -3.9462800 -0.1669760

7 7.1785570 3.6573280 -0.1630720

1 7.4072440 4.6361280 -0.2795330

1 7.7677710 3.0552490 -0.7233960
